# Supplementary material for: Interactions of protective behavioral strategies and cannabis use motives: An online survey among past-month users
Source: PLoS One. 2021 Mar 1;16(3):e0247387. doi: 10.1371/journal.pone.0247387 (PMC7920385; doi:10.1371/journal.pone.0247387)
Supplement: S1 Dataset — (XLSX) [file pone.0247387.s004.xlsx]

## Sheet: S1 Dataset
TableNumber_	Contactmethod	age	gender_m_w	education	can_past_year	can_freq_past_year	can_days_per_week	pbsm_1	pbsm_2	pbsm_3	pbsm_4	pbsm_5	pbsm_6	pbsm_7	pbsm_8	pbsm_9	pbsm_10	pbsm_11	pbsm_12	pbsm_13	pbsm_14	pbsm_15	pbsm_16	pbsm_17	pbsm_18	pbsm_19	pbsm_20	pbsm_21	pbsm_22	pbsm_23	pbsm_24	pbsm_25	pbsm_26	pbsm_27	pbsm_28	pbsm_29	pbsm_30	pbsm_31	pbsm_32	pbsm_33	pbsm_34	pbsm_35	pbsm_36	coping_1	coping_4	coping_6	coping_17	enhancement_7	enhancement_10
1	letter	49	male	high school degree	yes	daily	0	sometimes	occasionally	usually	occasionally	never	rarely	never	always	always	occasionally	usually	always	always	rarely	never	rarely	never	always	usually	occasionally	never	usually	sometimes	never	rarely	usually	usually	never	rarely	rarely	always	rarely	never	occasionally	rarely	occasionally	some of the time	most of the time	some of the time	some of the time	most of the time	most of the time
2	other	43	male	apprenticeship	yes	several times per week	5	usually	always	always	usually	always	always	occasionally	always	always	usually	usually	always	always	usually	never	always	usually	always	usually	usually	never	usually	usually	usually	usually	usually	rarely	rarely	usually	rarely	usually	usually	usually	sometimes	usually	usually	most of the time	some of the time	almost never/never	half of the time	most of the time	most of the time
3	other	39	male	university degree	yes	once in a month	0	usually	always	always	always	always	always	usually	always	usually	always	always	always	always	usually	usually	always	usually	always	usually	always	always	occasionally	always	usually	usually	occasionally	always	always	usually	usually	usually	always	usually	usually	sometimes	always	some of the time	almost never/never	almost never/never	half of the time	most of the time	most of the time
4	(social) media	42	male	university degree	yes	several times per week	6	sometimes	usually	always	usually	always	always	usually	always	always	sometimes	usually	always	always	sometimes	rarely	always	usually	always	usually	usually	usually	usually	always	sometimes	usually	always	always	always	always	usually	always	always	always	usually	usually	always	some of the time	some of the time	half of the time	almost never/never	almost always/always	most of the time
5	other	33	female	apprenticeship	yes	daily	0	never	rarely	usually	never	usually	usually	never	always	usually	never	usually	rarely	usually	never	never	rarely	never	rarely	rarely	rarely	sometimes	never	never	never	never	never	usually	rarely	rarely	never	always	rarely	never	occasionally	rarely	always	almost always/always	almost always/always	half of the time	almost always/always	almost always/always	almost always/always
6	(social) media	30	male	university degree	yes	daily	0	usually	usually	always	always	always	never	rarely	always	always	rarely	never	never	always	never	sometimes	never	never	never	occasionally	rarely	never	never	usually	never	rarely	rarely	always	occasionally	never	never	never	usually	usually	never	occasionally	never	almost never/never	almost never/never	almost never/never	almost never/never	most of the time	most of the time
7	letter	19	male	high school degree	yes	several times per week	2	always	always	always	rarely	rarely	sometimes	always	always	usually	sometimes	never	rarely	always	sometimes	never	always	never	never	sometimes	rarely	never	never	usually	rarely	rarely	never	usually	never	occasionally	sometimes	sometimes	rarely	never	rarely	sometimes	sometimes	almost never/never	almost never/never	some of the time	almost never/never	most of the time	almost always/always
8	other	39	female	university degree	yes	daily	0	always	sometimes	always	usually	sometimes	sometimes	never	always	always	never	usually	rarely	usually	rarely	never	always	usually	never	usually	never	never	never	usually	rarely	rarely	usually	usually	occasionally	usually	never	usually	usually	sometimes	never	usually	occasionally	almost never/never	some of the time	some of the time	some of the time	almost always/always	most of the time
9	letter	37	male	higher college degree	yes	several times per week	6	usually	always	always	always	usually	usually	never	always	always	never	always	always	always	never	never	always	usually	4.44246	usually	rarely	never	rarely	usually	usually	rarely	never	sometimes	occasionally	usually	always	always	always	always	never	usually	occasionally	almost never/never	almost never/never	some of the time	some of the time	half of the time	most of the time
10	(social) media	48	female	high school degree	yes	daily	0	always	rarely	occasionally	never	usually	rarely	never	occasionally	usually	never	never	always	occasionally	occasionally	never	rarely	never	sometimes	usually	occasionally	sometimes	usually	sometimes	sometimes	rarely	always	never	rarely	always	rarely	never	rarely	always	never	always	occasionally	some of the time	most of the time	some of the time	some of the time	most of the time	almost never/never
11	other	49	male	apprenticeship	yes	several times per week	4	always	always	always	always	always	always	sometimes	always	always	rarely	always	always	always	never	sometimes	always	always	usually	usually	sometimes	always	never	always	usually	usually	always	always	usually	usually	sometimes	occasionally	usually	always	sometimes	usually	always	almost never/never	most of the time	half of the time	almost never/never	most of the time	some of the time
12	letter	21	female	apprenticeship	yes	daily	0	occasionally	usually	rarely	rarely	rarely	rarely	never	rarely	always	never	rarely	always	usually	never	never	always	never	usually	rarely	occasionally	sometimes	never	rarely	never	never	never	rarely	never	rarely	never	never	rarely	occasionally	never	usually	usually	some of the time	some of the time	some of the time	half of the time	almost always/always	most of the time
13	(social) media	22	male	apprenticeship	yes	daily	0	rarely	rarely	usually	sometimes	occasionally	rarely	occasionally	always	always	sometimes	usually	rarely	usually	always	sometimes	always	sometimes	always	sometimes	usually	sometimes	always	sometimes	sometimes	sometimes	sometimes	sometimes	sometimes	occasionally	sometimes	sometimes	always	sometimes	rarely	sometimes	usually	almost never/never	almost always/always	some of the time	almost never/never	almost always/always	almost always/always
14	(social) media	30	female	university degree	yes	once in a month	0	usually	always	always	always	sometimes	rarely	sometimes	always	usually	always	always	never	always	usually	occasionally	usually	usually	always	usually	always	never	never	always	sometimes	never	usually	usually	usually	occasionally	usually	sometimes	always	rarely	never	usually	usually	almost never/never	almost never/never	almost never/never	almost never/never	some of the time	most of the time
15	letter	26	male	apprenticeship	yes	once a week	0	usually	usually	always	always	occasionally	rarely	sometimes	always	always	occasionally	usually	always	always	sometimes	always	usually	usually	always	usually	sometimes	never	always	always	sometimes	always	always	usually	usually	usually	sometimes	usually	always	usually	usually	usually	always	almost never/never	almost never/never	almost never/never	almost never/never	most of the time	most of the time
16	letter	51	male	higher college degree	yes	daily	0	sometimes	rarely	always	occasionally	sometimes	sometimes	never	always	always	never	occasionally	never	always	never	never	never	sometimes	usually	sometimes	never	never	always	occasionally	never	never	usually	usually	rarely	sometimes	never	rarely	rarely	never	never	rarely	rarely	almost never/never	most of the time	some of the time	almost never/never	almost always/always	almost never/never
17	letter	26	male	apprenticeship	yes	once a week	0	sometimes	always	always	always	never	rarely	sometimes	always	always	always	never	usually	always	never	never	always	never	always	never	always	never	rarely	usually	rarely	sometimes	occasionally	always	never	rarely	rarely	occasionally	always	always	always	usually	usually	almost never/never	almost never/never	almost never/never	almost never/never	almost always/always	almost always/always
18	(social) media	23	male	high school degree	yes	several times per week	4	always	always	always	always	rarely	never	usually	sometimes	usually	always	usually	always	always	never	never	never	rarely	always	occasionally	always	rarely	never	always	never	rarely	rarely	never	never	rarely	rarely	occasionally	always	never	sometimes	occasionally	usually	almost never/never	almost never/never	almost never/never	almost never/never	most of the time	almost always/always
19	(social) media	38	male	university degree	yes	several times per week	3	usually	occasionally	always	occasionally	always	occasionally	rarely	usually	usually	rarely	always	usually	rarely	usually	rarely	usually	never	always	occasionally	usually	never	never	rarely	always	always	always	always	usually	occasionally	usually	usually	never	never	occasionally	usually	rarely	some of the time	most of the time	most of the time	almost never/never	most of the time	half of the time
20	other	55	female	higher college degree	yes	several times per week	5	usually	always	always	sometimes	always	usually	sometimes	always	usually	usually	always	usually	always	sometimes	usually	always	sometimes	always	usually	sometimes	usually	usually	always	sometimes	sometimes	sometimes	usually	usually	sometimes	usually	sometimes	sometimes	always	sometimes	usually	always	almost never/never	some of the time	some of the time	almost never/never	most of the time	half of the time
21	(social) media	38	female	apprenticeship	yes	daily	0	always	always	always	sometimes	occasionally	always	always	sometimes	always	never	always	always	always	always	never	always	occasionally	always	sometimes	occasionally	sometimes	always	always	occasionally	usually	always	never	usually	always	occasionally	occasionally	sometimes	always	occasionally	usually	always	some of the time	most of the time	almost never/never	most of the time	almost always/always	almost always/always
22	(social) media	35	male	apprenticeship	yes	several times per week	6	usually	always	always	rarely	sometimes	occasionally	sometimes	always	usually	sometimes	always	usually	always	usually	rarely	never	usually	always	sometimes	sometimes	usually	usually	always	rarely	usually	always	usually	usually	rarely	usually	rarely	never	usually	rarely	sometimes	always	almost never/never	almost never/never	almost never/never	almost never/never	most of the time	most of the time
23	other	79	female	higher college degree	yes	daily	0	rarely	always	always	rarely	always	usually	usually	usually	usually	never	always	always	always	never	usually	never	usually	never	always	always	never	always	sometimes	never	never	never	never	always	always	never	never	never	always	never	rarely	never	some of the time	almost never/never	almost never/never	almost never/never	almost always/always	almost always/always
24	letter	35	male	apprenticeship	yes	once a week	0	usually	usually	always	sometimes	always	usually	always	always	always	always	always	never	always	usually	rarely	always	sometimes	always	usually	always	sometimes	always	always	never	always	never	always	sometimes	always	never	sometimes	always	rarely	rarely	sometimes	always	almost never/never	some of the time	almost never/never	almost never/never	most of the time	some of the time
25	other	51	male	higher college degree	yes	several times per week	6	sometimes	always	always	always	always	always	occasionally	always	usually	never	always	sometimes	always	always	rarely	always	always	always	usually	sometimes	rarely	always	always	always	usually	always	always	sometimes	usually	always	rarely	always	usually	rarely	usually	always	almost never/never	almost never/never	almost never/never	almost never/never	most of the time	some of the time
26	other	22	male	apprenticeship	yes	daily	0	rarely	usually	usually	never	occasionally	never	never	never	always	never	never	usually	sometimes	rarely	never	never	never	always	rarely	never	rarely	never	sometimes	rarely	usually	usually	rarely	rarely	occasionally	occasionally	never	usually	rarely	rarely	never	rarely	almost never/never	most of the time	some of the time	almost never/never	almost always/always	almost always/always
27	letter	35	male	higher college degree	yes	several times per week	6	always	usually	always	sometimes	always	always	never	always	sometimes	never	always	never	always	always	never	always	usually	always	usually	never	never	always	always	always	always	always	always	always	usually	always	usually	sometimes	always	occasionally	always	always	almost never/never	almost never/never	almost never/never	almost never/never	almost always/always	almost never/never
28	other	21	male	higher college degree	yes	several times per week	3	occasionally	always	always	always	never	rarely	usually	always	usually	rarely	never	always	always	never	occasionally	usually	usually	always	occasionally	usually	never	always	always	never	usually	never	rarely	usually	occasionally	rarely	usually	always	usually	usually	usually	usually	almost never/never	almost never/never	almost never/never	almost never/never	almost always/always	almost always/always
29	(social) media	51	female	higher college degree	yes	once a week	0	always	never	always	always	always	always	sometimes	always	always	always	always	always	always	always	usually	always	always	always	always	always	always	never	always	always	always	always	always	always	usually	always	always	always	always	usually	usually	always	almost never/never	almost never/never	most of the time	almost never/never	almost always/always	most of the time
30	(social) media	24	female	apprenticeship	yes	several times per week	5	usually	always	always	usually	always	usually	sometimes	always	always	sometimes	always	always	always	usually	rarely	always	usually	always	usually	always	occasionally	always	always	rarely	always	always	usually	usually	usually	rarely	usually	usually	always	sometimes	usually	always	some of the time	some of the time	some of the time	some of the time	most of the time	most of the time
31	other	26	male	apprenticeship	yes	several times per week	6	rarely	always	always	never	usually	rarely	rarely	always	usually	rarely	never	never	always	never	never	never	rarely	usually	sometimes	usually	never	never	usually	never	never	usually	always	never	occasionally	never	occasionally	occasionally	never	never	always	occasionally	almost never/never	half of the time	almost never/never	almost never/never	most of the time	almost always/always
32	(social) media	24	male	apprenticeship	yes	daily	0	occasionally	rarely	always	rarely	usually	rarely	never	always	always	rarely	sometimes	rarely	always	rarely	occasionally	never	usually	usually	usually	occasionally	occasionally	rarely	usually	occasionally	rarely	usually	usually	sometimes	rarely	sometimes	never	occasionally	rarely	sometimes	sometimes	always	some of the time	some of the time	half of the time	some of the time	most of the time	almost always/always
33	letter	46	female	university degree	yes	daily	0	occasionally	always	always	rarely	always	always	never	never	always	never	always	always	rarely	usually	occasionally	3.48558	always	always	always	always	occasionally	always	always	always	always	always	never	always	always	always	always	sometimes	always	usually	always	always	some of the time	most of the time	some of the time	almost never/never	some of the time	almost never/never
34	(social) media	50	male	higher college degree	yes	once in a month	0	usually	never	always	rarely	occasionally	never	usually	usually	usually	always	always	never	always	always	sometimes	always	usually	always	usually	always	never	always	always	always	always	never	always	never	never	usually	always	sometimes	never	always	always	always	almost never/never	almost never/never	some of the time	almost never/never	almost always/always	almost always/always
35	(social) media	27	male	higher college degree	yes	daily	0	usually	sometimes	always	usually	always	always	never	always	usually	occasionally	usually	usually	always	never	rarely	usually	occasionally	always	rarely	rarely	sometimes	rarely	always	never	sometimes	usually	always	never	never	usually	usually	sometimes	never	rarely	usually	sometimes	some of the time	half of the time	half of the time	almost never/never	almost always/always	most of the time
36	letter	43	male	apprenticeship	yes	daily	0	usually	usually	always	always	usually	sometimes	rarely	always	always	rarely	always	usually	always	usually	rarely	usually	sometimes	always	sometimes	usually	never	always	always	rarely	sometimes	usually	always	sometimes	sometimes	sometimes	usually	usually	rarely	rarely	usually	usually	almost never/never	some of the time	some of the time	almost never/never	almost always/always	almost always/always
37	letter	45	male	higher college degree	yes	several times per week	4	always	always	always	always	never	always	usually	never	always	rarely	never	always	never	usually	always	never	always	never	always	always	usually	always	always	usually	always	rarely	always	sometimes	always	always	always	always	always	sometimes	always	usually	almost never/never	some of the time	some of the time	almost never/never	half of the time	almost never/never
38	(social) media	30	male	university degree	yes	several times per week	2	usually	always	always	always	sometimes	sometimes	always	always	always	sometimes	always	always	always	usually	usually	always	always	always	sometimes	always	always	always	always	sometimes	sometimes	sometimes	always	usually	sometimes	usually	always	always	usually	occasionally	always	always	almost never/never	almost never/never	almost never/never	almost never/never	almost always/always	most of the time
39	(social) media	26	male	high school degree	yes	several times per week	3	occasionally	sometimes	always	usually	always	always	rarely	always	always	usually	always	always	always	always	always	always	usually	always	always	always	never	never	usually	always	sometimes	always	always	occasionally	occasionally	always	usually	sometimes	rarely	never	usually	usually	some of the time	most of the time	some of the time	some of the time	some of the time	some of the time
40	(social) media	21	female	university degree	yes	daily	0	occasionally	sometimes	always	occasionally	always	always	occasionally	always	always	occasionally	always	always	always	usually	never	always	usually	usually	usually	usually	sometimes	always	sometimes	never	never	usually	always	usually	usually	usually	usually	never	always	occasionally	sometimes	always	half of the time	some of the time	some of the time	some of the time	most of the time	almost always/always
41	other	22	male	university degree	yes	several times per week	5	sometimes	usually	always	occasionally	rarely	rarely	rarely	never	usually	sometimes	rarely	rarely	occasionally	never	rarely	rarely	occasionally	always	rarely	sometimes	never	usually	always	rarely	sometimes	rarely	occasionally	rarely	occasionally	rarely	sometimes	usually	never	usually	never	never	some of the time	almost never/never	almost never/never	some of the time	almost always/always	almost always/always
42	other	21	male	high school degree	yes	several times per week	3	usually	always	always	usually	always	always	usually	always	always	always	always	always	always	always	never	usually	usually	always	never	always	never	sometimes	usually	usually	always	always	always	sometimes	never	never	occasionally	always	never	sometimes	sometimes	usually	almost never/never	almost never/never	almost never/never	almost never/never	almost always/always	almost always/always
43	(social) media	42	female	apprenticeship	yes	several times per week	3	usually	usually	always	usually	usually	usually	usually	usually	always	always	always	usually	always	usually	never	always	usually	always	usually	always	sometimes	sometimes	usually	usually	usually	usually	usually	usually	usually	sometimes	usually	always	always	usually	occasionally	always	almost never/never	half of the time	almost never/never	some of the time	most of the time	most of the time
44	other	28	male	apprenticeship	yes	daily	0	usually	usually	sometimes	always	usually	occasionally	never	always	always	rarely	occasionally	usually	always	occasionally	rarely	usually	rarely	always	usually	rarely	usually	occasionally	usually	rarely	sometimes	usually	always	rarely	rarely	occasionally	rarely	usually	occasionally	rarely	occasionally	rarely	almost never/never	almost never/never	some of the time	almost never/never	almost always/always	most of the time
45	other	33	female	higher college degree	yes	daily	0	usually	usually	always	occasionally	never	usually	rarely	always	always	rarely	rarely	usually	always	sometimes	never	rarely	usually	rarely	usually	usually	rarely	always	always	usually	occasionally	always	always	usually	always	usually	never	occasionally	always	never	rarely	always	some of the time	most of the time	some of the time	some of the time	almost always/always	some of the time
46	letter	27	male	apprenticeship	yes	once in a month	0	usually	always	always	always	always	usually	usually	always	always	usually	always	always	always	usually	occasionally	never	usually	usually	usually	usually	usually	usually	always	always	usually	usually	always	usually	sometimes	sometimes	usually	usually	usually	sometimes	sometimes	sometimes	almost never/never	almost never/never	almost never/never	almost never/never	most of the time	most of the time
47	letter	37	male	apprenticeship	yes	several times per week	5	sometimes	always	always	sometimes	always	always	sometimes	always	sometimes	rarely	usually	usually	always	always	never	always	sometimes	always	usually	sometimes	rarely	rarely	usually	rarely	occasionally	sometimes	sometimes	occasionally	usually	sometimes	never	usually	sometimes	sometimes	sometimes	usually	some of the time	most of the time	most of the time	almost never/never	almost always/always	most of the time
48	(social) media	66	female	apprenticeship	yes	once in a month	0	occasionally	always	always	usually	always	usually	occasionally	always	always	sometimes	always	always	always	usually	sometimes	always	usually	always	usually	always	usually	usually	always	usually	always	always	usually	sometimes	usually	always	always	always	usually	always	usually	always	almost never/never	almost never/never	some of the time	almost never/never	almost always/always	half of the time
49	(social) media	28	male	university degree	yes	once in a month	0	always	always	always	usually	always	always	always	always	always	always	always	never	always	always	never	never	always	always	usually	always	occasionally	sometimes	always	sometimes	sometimes	sometimes	sometimes	sometimes	sometimes	sometimes	sometimes	sometimes	usually	always	sometimes	always	some of the time	some of the time	some of the time	some of the time	almost always/always	almost always/always
50	letter	24	male	university degree	yes	once a week	0	sometimes	usually	always	usually	always	rarely	rarely	always	usually	always	usually	rarely	always	rarely	rarely	sometimes	rarely	sometimes	occasionally	usually	rarely	occasionally	always	never	sometimes	rarely	usually	usually	rarely	rarely	usually	usually	rarely	usually	occasionally	usually	almost never/never	some of the time	almost never/never	almost never/never	almost always/always	almost always/always
51	other	23	male	apprenticeship	yes	once a week	0	usually	usually	always	occasionally	sometimes	rarely	usually	sometimes	always	usually	usually	always	always	rarely	always	always	usually	always	sometimes	usually	sometimes	never	always	never	sometimes	always	usually	never	sometimes	never	sometimes	rarely	rarely	usually	occasionally	rarely	some of the time	some of the time	some of the time	some of the time	most of the time	most of the time
52	(social) media	21	male	high school degree	yes	daily	0	usually	rarely	always	rarely	usually	usually	rarely	always	usually	never	usually	never	always	sometimes	always	always	sometimes	usually	rarely	sometimes	always	always	usually	never	always	rarely	always	usually	usually	sometimes	never	sometimes	occasionally	rarely	sometimes	always	almost never/never	almost never/never	almost never/never	almost never/never	almost always/always	most of the time
53	letter	31	female	university degree	yes	daily	0	never	occasionally	usually	never	never	rarely	never	always	occasionally	never	usually	occasionally	always	rarely	never	never	rarely	occasionally	occasionally	never	never	never	occasionally	never	occasionally	never	never	rarely	rarely	never	never	rarely	never	never	rarely	rarely	some of the time	some of the time	some of the time	some of the time	most of the time	some of the time
54	other	21	female	apprenticeship	yes	daily	0	usually	sometimes	never	rarely	never	never	never	always	always	never	occasionally	usually	always	always	occasionally	always	never	always	never	occasionally	occasionally	never	always	never	occasionally	rarely	occasionally	occasionally	rarely	sometimes	occasionally	never	rarely	never	occasionally	always	half of the time	some of the time	most of the time	some of the time	almost always/always	some of the time
55	other	26	male	university degree	yes	daily	0	usually	always	always	sometimes	usually	usually	never	always	usually	rarely	usually	rarely	always	usually	occasionally	usually	occasionally	always	usually	occasionally	usually	sometimes	occasionally	rarely	rarely	occasionally	sometimes	never	always	always	rarely	occasionally	sometimes	never	sometimes	usually	almost never/never	almost never/never	some of the time	almost never/never	almost always/always	almost always/always
56	other	20	male	apprenticeship	yes	once a week	0	usually	always	usually	sometimes	rarely	rarely	usually	usually	usually	usually	sometimes	never	always	rarely	always	always	never	never	never	rarely	never	rarely	usually	rarely	never	never	occasionally	rarely	rarely	rarely	never	never	never	rarely	rarely	usually	almost never/never	almost never/never	almost never/never	almost never/never	almost always/always	almost always/always
57	letter	36	male	university degree	yes	once in a month	0	usually	always	always	always	always	occasionally	always	always	usually	always	always	never	always	rarely	never	occasionally	usually	always	usually	always	sometimes	always	always	always	always	usually	always	usually	occasionally	sometimes	usually	always	sometimes	always	usually	always	almost never/never	almost never/never	almost never/never	almost never/never	almost always/always	most of the time
58	(social) media	37	male	university degree	yes	several times per week	3	usually	always	always	usually	usually	sometimes	sometimes	always	usually	usually	always	sometimes	always	usually	rarely	always	always	always	usually	sometimes	sometimes	occasionally	always	rarely	usually	usually	usually	usually	usually	usually	sometimes	sometimes	usually	occasionally	sometimes	always	some of the time	almost never/never	almost never/never	some of the time	most of the time	some of the time
59	letter	34	female	higher college degree	yes	several times per week	7	sometimes	rarely	always	never	always	sometimes	never	always	usually	never	sometimes	sometimes	usually	usually	never	sometimes	occasionally	usually	sometimes	rarely	never	rarely	sometimes	sometimes	occasionally	always	always	sometimes	usually	usually	rarely	sometimes	always	occasionally	sometimes	usually	half of the time	most of the time	most of the time	half of the time	most of the time	half of the time
60	(social) media	53	female	higher college degree	yes	daily	0	always	usually	always	rarely	usually	always	never	always	always	sometimes	sometimes	sometimes	rarely	usually	never	always	never	usually	usually	rarely	never	always	never	occasionally	always	rarely	never	sometimes	always	sometimes	never	never	never	never	usually	never	almost never/never	some of the time	some of the time	almost never/never	almost never/never	some of the time
61	other	21	male	apprenticeship	yes	once in a month	0	usually	always	always	always	always	always	sometimes	always	usually	always	never	never	always	usually	sometimes	always	sometimes	always	sometimes	sometimes	never	occasionally	always	never	never	never	never	never	never	never	sometimes	usually	never	sometimes	sometimes	usually	almost never/never	almost never/never	almost never/never	almost never/never	almost always/always	almost always/always
62	(social) media	55	female	higher college degree	yes	once in a month	0	occasionally	usually	always	never	always	always	usually	always	usually	always	usually	never	always	always	rarely	always	occasionally	always	occasionally	always	sometimes	always	always	always	occasionally	always	always	always	occasionally	always	sometimes	always	sometimes	usually	usually	usually	almost never/never	almost never/never	almost never/never	almost never/never	almost always/always	almost always/always
63	(social) media	22	male	high school degree	yes	several times per week	3	always	usually	usually	usually	never	occasionally	sometimes	always	usually	sometimes	sometimes	always	usually	rarely	occasionally	always	rarely	rarely	never	occasionally	rarely	never	sometimes	never	rarely	never	occasionally	never	rarely	rarely	never	never	never	sometimes	never	rarely	almost never/never	almost never/never	some of the time	almost never/never	almost always/always	almost always/always
64	letter	37	male	higher college degree	yes	once a week	0	usually	usually	always	always	usually	usually	sometimes	always	always	always	always	always	always	always	always	always	never	always	rarely	always	never	never	always	occasionally	usually	always	always	rarely	never	rarely	sometimes	always	always	always	always	sometimes	almost never/never	some of the time	almost never/never	almost never/never	most of the time	some of the time
65	other	25	female	apprenticeship	yes	daily	0	usually	occasionally	always	sometimes	usually	occasionally	never	always	usually	never	usually	rarely	always	usually	never	sometimes	sometimes	usually	usually	usually	sometimes	always	usually	never	never	usually	always	rarely	sometimes	usually	never	sometimes	usually	rarely	usually	usually	almost never/never	some of the time	some of the time	almost never/never	almost always/always	almost always/always
66	letter	35	female	higher college degree	yes	daily	0	always	always	always	always	always	always	never	always	always	never	usually	never	always	usually	never	always	usually	always	rarely	occasionally	rarely	never	always	usually	usually	always	always	usually	sometimes	sometimes	usually	rarely	usually	rarely	usually	always	some of the time	almost never/never	some of the time	some of the time	some of the time	almost never/never
67	letter	40	male	apprenticeship	yes	once a week	0	usually	always	always	sometimes	always	always	sometimes	always	rarely	sometimes	always	never	always	sometimes	never	never	occasionally	always	sometimes	always	never	always	always	usually	sometimes	never	always	rarely	never	never	never	sometimes	never	sometimes	usually	always	almost never/never	some of the time	almost never/never	some of the time	almost always/always	almost always/always
68	(social) media	44	male	higher college degree	yes	several times per week	3	sometimes	occasionally	always	usually	always	always	usually	always	usually	usually	always	sometimes	always	sometimes	occasionally	always	usually	usually	usually	usually	usually	usually	usually	rarely	usually	usually	always	sometimes	always	sometimes	never	usually	usually	occasionally	sometimes	always	almost never/never	almost never/never	almost never/never	almost never/never	almost always/always	most of the time
69	letter	26	female	apprenticeship	yes	daily	0	sometimes	usually	usually	never	sometimes	always	sometimes	usually	always	always	sometimes	usually	always	never	never	always	never	always	usually	usually	always	always	always	always	usually	always	always	sometimes	never	sometimes	never	always	rarely	sometimes	sometimes	never	some of the time	some of the time	some of the time	almost never/never	almost always/always	almost always/always
70	letter	42	male	university degree	yes	several times per week	6	always	always	always	usually	always	usually	never	always	usually	never	always	never	always	never	never	always	always	always	usually	sometimes	occasionally	always	always	always	sometimes	always	never	always	never	never	always	rarely	always	occasionally	usually	sometimes	some of the time	some of the time	most of the time	some of the time	almost always/always	almost always/always
71	letter	27	male	higher college degree	yes	several times per week	5	occasionally	sometimes	always	rarely	usually	never	never	always	always	never	always	never	always	never	sometimes	always	rarely	usually	occasionally	sometimes	never	never	never	never	never	always	never	sometimes	never	sometimes	always	never	never	occasionally	sometimes	always	almost always/always	almost always/always	some of the time	almost always/always	almost always/always	almost always/always
72	(social) media	52	male	university degree	yes	daily	0	never	always	always	usually	never	never	never	always	always	never	usually	rarely	always	always	never	occasionally	sometimes	5.18294	rarely	occasionally	rarely	always	sometimes	sometimes	usually	always	sometimes	rarely	occasionally	always	never	always	rarely	rarely	sometimes	usually	some of the time	some of the time	some of the time	some of the time	almost always/always	most of the time
73	other	31	male	university degree	yes	several times per week	4	usually	usually	always	sometimes	usually	rarely	usually	always	always	always	usually	rarely	always	never	occasionally	usually	usually	always	usually	usually	occasionally	always	usually	sometimes	sometimes	usually	always	sometimes	occasionally	occasionally	usually	usually	always	sometimes	usually	rarely	almost never/never	almost never/never	almost never/never	almost never/never	most of the time	most of the time
74	(social) media	21	male	apprenticeship	yes	once a week	0	sometimes	usually	always	always	sometimes	sometimes	usually	always	rarely	usually	usually	occasionally	usually	occasionally	never	never	sometimes	always	never	sometimes	never	never	always	occasionally	sometimes	always	usually	occasionally	never	rarely	usually	usually	usually	rarely	rarely	usually	almost never/never	almost never/never	almost never/never	almost never/never	almost always/always	most of the time
75	letter	30	male	university degree	yes	daily	0	never	always	always	sometimes	never	never	never	always	always	never	always	rarely	always	always	never	occasionally	usually	sometimes	rarely	rarely	never	rarely	always	never	rarely	always	usually	occasionally	usually	always	usually	rarely	sometimes	never	usually	usually	some of the time	some of the time	almost never/never	some of the time	almost always/always	some of the time
76	other	21	male	higher college degree	yes	several times per week	3	usually	always	always	sometimes	always	rarely	rarely	always	always	rarely	usually	usually	always	rarely	occasionally	usually	rarely	usually	never	rarely	occasionally	rarely	always	sometimes	rarely	occasionally	usually	rarely	usually	sometimes	usually	rarely	never	occasionally	sometimes	usually	almost never/never	some of the time	some of the time	almost never/never	almost always/always	most of the time
77	(social) media	35	male	university degree	yes	once a week	0	rarely	always	always	rarely	always	sometimes	usually	always	sometimes	sometimes	always	always	always	occasionally	rarely	always	occasionally	usually	usually	usually	rarely	rarely	always	occasionally	occasionally	rarely	usually	sometimes	usually	sometimes	usually	occasionally	occasionally	occasionally	occasionally	usually	some of the time	almost never/never	almost never/never	some of the time	almost always/always	half of the time
78	letter	33	male	higher college degree	yes	daily	0	sometimes	usually	always	rarely	sometimes	rarely	occasionally	always	usually	rarely	always	always	always	always	rarely	always	usually	always	sometimes	usually	never	always	always	never	sometimes	always	always	usually	sometimes	usually	usually	usually	always	sometimes	usually	usually	some of the time	almost never/never	some of the time	some of the time	most of the time	most of the time
79	other	20	male	apprenticeship	yes	daily	0	sometimes	never	always	sometimes	occasionally	sometimes	never	occasionally	usually	sometimes	occasionally	usually	always	rarely	occasionally	sometimes	never	sometimes	never	never	occasionally	rarely	usually	never	occasionally	rarely	usually	never	sometimes	rarely	never	never	rarely	never	occasionally	usually	some of the time	almost never/never	some of the time	some of the time	most of the time	most of the time
80	letter	28	male	university degree	yes	once a week	0	usually	usually	usually	sometimes	rarely	never	rarely	always	usually	sometimes	sometimes	occasionally	rarely	rarely	occasionally	rarely	rarely	usually	rarely	usually	rarely	usually	rarely	sometimes	usually	rarely	occasionally	rarely	rarely	occasionally	sometimes	rarely	rarely	rarely	occasionally	rarely	almost never/never	almost never/never	some of the time	almost never/never	almost always/always	most of the time
81	(social) media	41	male	higher college degree	yes	several times per week	2	usually	usually	always	usually	always	sometimes	sometimes	always	always	usually	always	rarely	always	usually	rarely	usually	rarely	usually	sometimes	usually	occasionally	always	usually	never	usually	always	usually	occasionally	sometimes	sometimes	always	usually	sometimes	usually	sometimes	always	almost never/never	some of the time	half of the time	some of the time	almost always/always	most of the time
82	other	23	female	apprenticeship	yes	daily	0	always	always	rarely	always	always	always	never	always	always	occasionally	rarely	always	always	always	rarely	always	never	always	always	occasionally	never	always	occasionally	always	usually	always	always	rarely	occasionally	rarely	never	always	always	occasionally	usually	usually	almost never/never	some of the time	almost never/never	almost never/never	almost always/always	some of the time
83	(social) media	21	male	apprenticeship	yes	once in a month	0	never	never	never	never	never	never	usually	never	usually	never	never	always	never	usually	never	never	always	never	usually	always	never	always	always	always	always	never	always	never	usually	always	never	never	never	always	usually	never	almost never/never	almost never/never	almost never/never	almost never/never	almost always/always	almost always/always
84	letter	32	male	higher college degree	yes	daily	0	usually	sometimes	always	never	always	usually	never	always	always	rarely	usually	always	always	usually	never	always	rarely	always	occasionally	rarely	rarely	always	usually	occasionally	always	usually	always	rarely	rarely	occasionally	usually	usually	rarely	never	rarely	usually	almost never/never	some of the time	almost never/never	almost never/never	most of the time	most of the time
85	other	22	male	apprenticeship	yes	daily	0	sometimes	usually	usually	occasionally	always	sometimes	never	always	usually	never	usually	never	always	rarely	never	never	occasionally	usually	rarely	rarely	occasionally	sometimes	sometimes	never	occasionally	3.68049	rarely	never	never	never	usually	occasionally	usually	never	rarely	rarely	some of the time	almost never/never	some of the time	some of the time	almost always/always	most of the time
86	(social) media	27	male	apprenticeship	yes	once a week	0	always	usually	always	usually	always	always	always	always	always	always	always	always	always	always	never	always	sometimes	always	usually	always	never	always	always	sometimes	always	occasionally	never	sometimes	usually	sometimes	always	usually	never	usually	rarely	sometimes	almost always/always	almost always/always	almost always/always	almost always/always	almost always/always	almost always/always
87	letter	49	male	high school degree	yes	once in a month	0	usually	always	always	usually	always	always	usually	always	usually	always	always	never	always	occasionally	rarely	usually	usually	always	usually	always	never	never	always	never	always	usually	always	always	always	sometimes	occasionally	sometimes	never	sometimes	never	always	some of the time	some of the time	some of the time	some of the time	most of the time	almost always/always
88	letter	24	male	university degree	yes	once in a month	0	usually	usually	always	usually	always	sometimes	sometimes	always	always	always	always	rarely	always	usually	occasionally	always	usually	always	sometimes	always	rarely	usually	usually	sometimes	always	always	always	usually	usually	sometimes	usually	always	usually	sometimes	always	always	almost never/never	almost never/never	almost never/never	almost never/never	almost always/always	some of the time
89	letter	32	male	apprenticeship	yes	once in a month	0	usually	always	always	sometimes	occasionally	rarely	sometimes	always	always	usually	always	occasionally	always	sometimes	sometimes	always	usually	always	occasionally	usually	sometimes	always	sometimes	occasionally	sometimes	usually	usually	sometimes	sometimes	sometimes	occasionally	occasionally	usually	usually	sometimes	always	most of the time	some of the time	some of the time	most of the time	most of the time	half of the time
90	letter	26	male	apprenticeship	yes	daily	0	never	always	always	sometimes	never	rarely	rarely	always	always	rarely	usually	always	usually	sometimes	rarely	always	usually	usually	sometimes	rarely	always	never	always	occasionally	rarely	usually	sometimes	rarely	rarely	rarely	never	sometimes	sometimes	occasionally	rarely	usually	some of the time	some of the time	some of the time	some of the time	almost always/always	almost always/always
91	other	20	female	higher college degree	yes	once in a month	0	always	always	always	always	usually	usually	occasionally	always	always	always	usually	always	always	always	rarely	always	occasionally	always	occasionally	always	always	always	always	rarely	always	usually	always	usually	sometimes	always	rarely	always	always	usually	usually	always	almost never/never	almost never/never	almost never/never	almost never/never	almost always/always	most of the time
92	other	24	female	university degree	yes	daily	0	rarely	usually	always	sometimes	usually	sometimes	rarely	always	always	never	always	always	always	usually	sometimes	never	usually	usually	rarely	sometimes	rarely	rarely	always	sometimes	sometimes	usually	usually	occasionally	occasionally	occasionally	sometimes	sometimes	rarely	rarely	usually	usually	some of the time	some of the time	almost never/never	almost never/never	most of the time	some of the time
93	letter	36	male	apprenticeship	yes	daily	0	never	rarely	rarely	never	always	rarely	never	always	usually	never	never	occasionally	never	never	never	never	never	sometimes	rarely	rarely	sometimes	never	occasionally	never	never	sometimes	always	rarely	rarely	rarely	never	never	never	never	rarely	rarely	almost always/always	almost always/always	almost always/always	almost always/always	almost always/always	almost always/always
94	letter	29	female	university degree	yes	once a week	0	rarely	usually	always	usually	sometimes	usually	rarely	always	usually	sometimes	sometimes	never	usually	usually	never	never	occasionally	usually	sometimes	rarely	never	rarely	usually	never	rarely	always	usually	sometimes	sometimes	never	never	sometimes	rarely	never	usually	usually	almost never/never	some of the time	almost never/never	almost never/never	almost always/always	almost always/always
95	(social) media	20	female	high school degree	yes	several times per week	6	usually	usually	usually	sometimes	sometimes	usually	sometimes	usually	always	usually	usually	occasionally	always	sometimes	rarely	always	occasionally	always	occasionally	usually	usually	sometimes	occasionally	sometimes	rarely	usually	always	usually	sometimes	sometimes	occasionally	usually	usually	never	usually	usually	some of the time	almost never/never	some of the time	almost never/never	most of the time	almost always/always
96	(social) media	21	male	high school degree	yes	several times per week	3	usually	always	always	sometimes	usually	rarely	sometimes	always	usually	always	sometimes	always	always	always	rarely	always	occasionally	always	never	usually	usually	never	always	never	rarely	always	sometimes	sometimes	never	rarely	occasionally	sometimes	rarely	occasionally	never	always	some of the time	almost never/never	some of the time	almost never/never	most of the time	almost always/always
97	letter	69	male	higher college degree	yes	several times per week	5	never	usually	always	occasionally	usually	always	rarely	usually	always	usually	sometimes	always	always	always	never	always	never	always	always	always	usually	always	rarely	always	rarely	never	never	rarely	always	always	always	occasionally	usually	usually	usually	sometimes	half of the time	half of the time	half of the time	half of the time	almost always/always	most of the time
98	(social) media	21	male	university degree	yes	several times per week	2	usually	always	always	always	sometimes	sometimes	usually	always	always	usually	usually	always	always	sometimes	sometimes	always	occasionally	always	occasionally	usually	occasionally	usually	always	rarely	usually	sometimes	occasionally	sometimes	occasionally	occasionally	sometimes	always	occasionally	rarely	rarely	usually	almost never/never	almost never/never	almost never/never	some of the time	almost always/always	almost always/always
99	other	28	male	higher college degree	yes	several times per week	4	usually	sometimes	always	never	usually	always	sometimes	always	always	sometimes	sometimes	always	always	usually	always	always	sometimes	always	usually	always	never	sometimes	always	always	sometimes	always	always	sometimes	usually	usually	never	always	sometimes	always	sometimes	sometimes	almost never/never	almost never/never	almost never/never	almost never/never	almost always/always	almost always/always
100	other	31	female	higher college degree	yes	daily	0	usually	always	always	rarely	always	sometimes	never	usually	always	never	always	sometimes	always	never	never	usually	rarely	usually	usually	occasionally	never	occasionally	usually	occasionally	sometimes	usually	usually	usually	usually	sometimes	never	occasionally	always	rarely	occasionally	usually	some of the time	some of the time	some of the time	some of the time	most of the time	some of the time
101	other	24	male	university degree	yes	several times per week	6	usually	occasionally	always	usually	always	sometimes	occasionally	always	always	rarely	usually	always	always	sometimes	occasionally	usually	sometimes	always	rarely	usually	rarely	always	always	occasionally	sometimes	always	always	usually	rarely	usually	usually	occasionally	rarely	occasionally	always	usually	almost never/never	almost never/never	almost never/never	almost never/never	almost always/always	most of the time
102	other	42	male	university degree	yes	once a week	0	usually	always	always	rarely	always	always	sometimes	always	sometimes	always	always	rarely	always	never	sometimes	always	always	always	usually	always	rarely	always	always	rarely	always	always	always	always	always	always	always	usually	always	usually	always	always	some of the time	most of the time	some of the time	some of the time	half of the time	some of the time
103	other	27	male	apprenticeship	yes	once in a month	0	usually	sometimes	always	always	occasionally	occasionally	never	usually	usually	usually	rarely	never	always	usually	never	sometimes	usually	always	occasionally	sometimes	never	never	usually	rarely	sometimes	never	usually	rarely	usually	occasionally	rarely	usually	occasionally	usually	sometimes	usually	almost never/never	almost never/never	almost never/never	almost never/never	almost always/always	almost always/always
104	(social) media	20	female	higher college degree	yes	once a week	0	occasionally	usually	always	usually	occasionally	never	occasionally	always	sometimes	rarely	occasionally	usually	always	rarely	rarely	rarely	never	usually	usually	sometimes	never	never	sometimes	never	rarely	usually	always	occasionally	usually	rarely	rarely	usually	occasionally	rarely	rarely	usually	almost never/never	almost never/never	some of the time	almost never/never	almost always/always	most of the time
105	letter	37	male	university degree	yes	once in a month	0	usually	rarely	always	always	sometimes	usually	occasionally	usually	always	always	rarely	rarely	always	usually	always	never	rarely	always	usually	always	usually	usually	always	never	occasionally	always	always	rarely	always	always	never	always	occasionally	rarely	rarely	occasionally	almost never/never	almost never/never	almost never/never	almost never/never	most of the time	most of the time
106	(social) media	27	male	higher college degree	yes	several times per week	3	always	always	always	always	always	rarely	usually	always	always	usually	always	always	always	usually	never	always	usually	always	occasionally	always	never	always	always	always	usually	always	always	usually	always	usually	usually	always	always	rarely	rarely	always	almost never/never	almost never/never	almost never/never	almost never/never	almost always/always	most of the time
107	letter	39	male	university degree	yes	once a week	0	usually	always	always	always	usually	sometimes	never	always	always	always	always	always	always	always	always	always	always	always	usually	always	always	always	always	always	always	always	always	usually	always	always	rarely	always	sometimes	always	usually	always	almost never/never	almost never/never	almost never/never	almost never/never	almost always/always	almost never/never
108	(social) media	19	male	apprenticeship	yes	several times per week	2	usually	usually	always	always	always	occasionally	always	always	usually	always	usually	rarely	always	always	occasionally	always	occasionally	always	never	always	never	always	always	never	always	usually	always	occasionally	occasionally	occasionally	usually	always	usually	sometimes	rarely	always	some of the time	almost never/never	almost never/never	almost never/never	almost always/always	almost always/always
109	letter	30	male	university degree	yes	once in a month	0	usually	always	always	never	always	never	usually	always	usually	always	always	never	always	sometimes	occasionally	rarely	usually	always	never	always	occasionally	never	always	never	always	usually	always	occasionally	never	sometimes	usually	rarely	rarely	always	usually	always	almost never/never	almost never/never	almost never/never	almost never/never	most of the time	some of the time
110	(social) media	50	male	apprenticeship	yes	daily	0	always	never	never	never	always	always	never	never	always	never	never	always	always	never	never	always	never	never	always	never	never	always	never	never	always	never	always	never	always	usually	never	sometimes	never	never	never	never	almost never/never	almost always/always	almost always/always	almost never/never	almost always/always	most of the time
111	(social) media	20	male	high school degree	yes	once a week	0	usually	always	always	always	usually	rarely	usually	always	always	always	usually	always	always	usually	occasionally	always	usually	usually	rarely	usually	rarely	sometimes	always	never	always	never	sometimes	rarely	usually	sometimes	always	usually	occasionally	usually	sometimes	always	almost never/never	almost never/never	almost never/never	almost never/never	most of the time	almost always/always
112	(social) media	19	male	apprenticeship	yes	daily	0	occasionally	rarely	always	rarely	always	sometimes	rarely	always	always	rarely	rarely	usually	usually	sometimes	never	never	occasionally	usually	rarely	sometimes	usually	always	occasionally	usually	usually	occasionally	always	usually	sometimes	sometimes	sometimes	rarely	occasionally	usually	always	always	some of the time	almost never/never	almost never/never	half of the time	almost always/always	most of the time
113	letter	59	male	higher college degree	yes	daily	0	always	usually	always	always	always	always	never	rarely	always	never	always	always	always	never	never	always	never	always	usually	rarely	never	never	usually	always	always	usually	always	rarely	usually	always	always	always	never	rarely	never	always	almost never/never	almost never/never	almost never/never	almost never/never	almost always/always	almost always/always
114	(social) media	39	female	apprenticeship	yes	daily	0	always	usually	always	usually	always	usually	never	usually	usually	never	always	sometimes	always	occasionally	never	sometimes	usually	usually	sometimes	rarely	rarely	usually	always	usually	usually	usually	always	usually	usually	sometimes	occasionally	usually	usually	never	always	always	most of the time	most of the time	some of the time	some of the time	almost always/always	almost always/always
115	letter	31	male	university degree	yes	several times per week	4	usually	usually	usually	sometimes	usually	always	occasionally	always	usually	rarely	sometimes	occasionally	always	sometimes	rarely	rarely	rarely	usually	usually	usually	sometimes	always	always	usually	occasionally	occasionally	usually	usually	sometimes	usually	occasionally	sometimes	sometimes	sometimes	always	usually	almost never/never	half of the time	some of the time	almost never/never	almost always/always	some of the time
116	letter	30	male	higher college degree	yes	several times per week	3	usually	always	always	usually	always	sometimes	occasionally	always	usually	occasionally	always	sometimes	always	usually	rarely	usually	usually	usually	rarely	sometimes	sometimes	always	always	rarely	sometimes	usually	always	usually	rarely	sometimes	usually	usually	occasionally	rarely	sometimes	sometimes	almost never/never	some of the time	almost never/never	almost never/never	almost always/always	almost always/always
117	other	32	male	apprenticeship	yes	daily	0	rarely	never	rarely	rarely	never	sometimes	never	always	always	never	never	always	always	never	never	never	never	usually	never	occasionally	never	never	never	never	never	never	always	never	sometimes	never	never	occasionally	never	never	occasionally	usually	some of the time	almost never/never	almost never/never	some of the time	almost always/always	almost always/always
118	letter	27	female	higher college degree	yes	daily	0	usually	always	always	never	usually	never	rarely	always	usually	never	usually	always	always	never	never	never	usually	always	never	usually	never	always	always	never	never	never	always	sometimes	never	sometimes	usually	rarely	always	never	always	always	half of the time	half of the time	half of the time	half of the time	almost always/always	some of the time
119	(social) media	42	male	higher college degree	yes	daily	0	rarely	occasionally	always	rarely	usually	sometimes	rarely	always	usually	rarely	usually	rarely	always	occasionally	occasionally	occasionally	sometimes	sometimes	occasionally	sometimes	rarely	rarely	usually	rarely	occasionally	rarely	occasionally	occasionally	occasionally	never	rarely	rarely	rarely	occasionally	rarely	rarely	some of the time	some of the time	some of the time	some of the time	most of the time	most of the time
120	letter	39	male	university degree	yes	several times per week	5	occasionally	always	always	occasionally	usually	occasionally	occasionally	always	usually	rarely	always	sometimes	occasionally	usually	occasionally	usually	usually	sometimes	occasionally	occasionally	rarely	rarely	usually	rarely	usually	usually	sometimes	usually	rarely	rarely	never	rarely	usually	occasionally	occasionally	usually	some of the time	some of the time	some of the time	almost never/never	some of the time	most of the time
121	letter	18	female	high school degree	yes	once in a month	0	always	always	always	sometimes	always	always	usually	always	always	always	usually	usually	always	usually	usually	always	usually	always	usually	always	usually	usually	always	always	usually	usually	always	usually	usually	usually	usually	always	sometimes	always	always	always	some of the time	some of the time	some of the time	almost never/never	almost always/always	half of the time
122	(social) media	31	male	higher college degree	yes	daily	0	sometimes	always	always	sometimes	sometimes	usually	rarely	always	always	rarely	usually	sometimes	always	rarely	never	never	rarely	always	rarely	usually	rarely	rarely	occasionally	never	occasionally	usually	sometimes	rarely	never	never	never	occasionally	rarely	rarely	never	usually	some of the time	some of the time	some of the time	some of the time	almost always/always	almost always/always
123	(social) media	20	male	apprenticeship	yes	daily	0	usually	always	always	usually	sometimes	rarely	sometimes	always	usually	rarely	usually	rarely	always	occasionally	rarely	usually	usually	sometimes	rarely	occasionally	rarely	usually	usually	sometimes	rarely	usually	always	usually	sometimes	rarely	usually	occasionally	rarely	never	rarely	rarely	almost never/never	some of the time	most of the time	some of the time	almost always/always	most of the time
124	letter	22	female	higher college degree	yes	once a week	0	usually	always	always	sometimes	never	usually	sometimes	never	usually	usually	usually	rarely	always	sometimes	rarely	always	occasionally	always	sometimes	usually	usually	always	always	sometimes	rarely	always	always	usually	sometimes	rarely	sometimes	usually	sometimes	occasionally	usually	always	some of the time	some of the time	some of the time	some of the time	most of the time	almost always/always
125	other	29	female	university degree	yes	once in a month	0	usually	always	always	usually	usually	usually	usually	always	usually	always	sometimes	never	always	usually	occasionally	rarely	occasionally	usually	usually	sometimes	occasionally	always	always	never	sometimes	usually	usually	sometimes	usually	occasionally	never	occasionally	occasionally	rarely	sometimes	always	some of the time	almost never/never	some of the time	almost never/never	most of the time	almost always/always
126	other	18	male	apprenticeship	yes	several times per week	2	usually	always	usually	usually	always	sometimes	rarely	always	usually	sometimes	occasionally	always	always	sometimes	rarely	never	sometimes	occasionally	usually	occasionally	usually	occasionally	sometimes	rarely	usually	usually	sometimes	occasionally	occasionally	sometimes	usually	occasionally	occasionally	usually	usually	usually	some of the time	half of the time	half of the time	some of the time	almost always/always	half of the time
127	letter	51	female	apprenticeship	yes	once in a month	0	always	always	always	usually	sometimes	always	occasionally	always	always	usually	always	usually	always	usually	sometimes	always	usually	sometimes	sometimes	usually	sometimes	always	usually	usually	usually	sometimes	usually	sometimes	usually	usually	usually	sometimes	always	always	usually	usually	some of the time	some of the time	almost never/never	almost never/never	most of the time	some of the time
128	(social) media	56	female	higher college degree	yes	daily	0	rarely	occasionally	occasionally	never	sometimes	usually	never	rarely	always	never	never	rarely	occasionally	rarely	occasionally	always	never	never	occasionally	occasionally	rarely	never	sometimes	rarely	usually	always	always	never	rarely	usually	occasionally	rarely	usually	rarely	usually	usually	almost never/never	almost never/never	almost never/never	almost never/never	almost always/always	most of the time
129	(social) media	23	male	university degree	yes	several times per week	2	usually	usually	always	always	always	never	sometimes	usually	sometimes	usually	usually	usually	always	usually	occasionally	always	usually	always	sometimes	occasionally	never	always	usually	usually	usually	usually	rarely	rarely	usually	rarely	rarely	usually	never	sometimes	never	usually	almost never/never	almost never/never	almost never/never	almost never/never	almost always/always	most of the time
130	letter	29	male	higher college degree	yes	once in a month	0	always	always	always	always	always	usually	usually	always	always	always	usually	always	always	sometimes	usually	always	usually	always	sometimes	always	usually	usually	always	never	usually	usually	always	occasionally	occasionally	occasionally	usually	always	sometimes	usually	sometimes	always	almost never/never	almost never/never	almost never/never	almost never/never	most of the time	most of the time
131	letter	16	male	high school degree	yes	several times per week	3	usually	usually	usually	sometimes	usually	usually	usually	always	usually	sometimes	sometimes	usually	always	sometimes	sometimes	always	occasionally	always	sometimes	usually	usually	usually	usually	sometimes	sometimes	sometimes	sometimes	sometimes	sometimes	usually	sometimes	usually	sometimes	sometimes	sometimes	sometimes	some of the time	some of the time	some of the time	almost never/never	almost always/always	most of the time
132	other	38	male	university degree	yes	several times per week	2	occasionally	usually	always	rarely	occasionally	rarely	usually	usually	always	usually	usually	always	always	occasionally	sometimes	usually	usually	always	rarely	sometimes	usually	never	usually	never	rarely	always	usually	rarely	occasionally	sometimes	never	never	usually	never	sometimes	usually	almost never/never	half of the time	some of the time	almost never/never	almost always/always	almost always/always
133	other	32	male	university degree	yes	several times per week	2	occasionally	usually	always	usually	sometimes	occasionally	occasionally	usually	always	rarely	usually	usually	usually	usually	never	occasionally	occasionally	usually	rarely	occasionally	rarely	rarely	sometimes	rarely	occasionally	sometimes	usually	rarely	rarely	rarely	occasionally	occasionally	rarely	sometimes	usually	occasionally	some of the time	almost never/never	almost never/never	almost never/never	almost always/always	almost always/always
134	(social) media	65	male	apprenticeship	yes	daily	0	always	always	always	always	always	always	never	always	usually	never	never	always	always	usually	never	always	never	always	never	always	rarely	always	always	never	usually	usually	never	never	rarely	never	never	always	always	usually	never	always	almost never/never	almost never/never	almost never/never	almost never/never	almost always/always	most of the time
135	(social) media	52	female	apprenticeship	yes	daily	0	usually	occasionally	occasionally	rarely	usually	usually	never	always	usually	rarely	rarely	usually	sometimes	never	never	rarely	never	sometimes	occasionally	usually	occasionally	always	occasionally	rarely	occasionally	usually	always	never	sometimes	never	never	occasionally	rarely	rarely	sometimes	always	half of the time	half of the time	half of the time	half of the time	almost always/always	most of the time
136	letter	20	male	high school degree	yes	several times per week	6	sometimes	always	always	usually	always	always	rarely	always	sometimes	rarely	always	always	always	occasionally	rarely	always	usually	always	usually	always	sometimes	always	always	sometimes	occasionally	always	always	sometimes	occasionally	usually	always	always	usually	sometimes	sometimes	always	almost never/never	almost never/never	almost never/never	almost never/never	half of the time	half of the time
137	(social) media	30	male	university degree	yes	daily	0	rarely	never	usually	never	rarely	occasionally	occasionally	always	usually	rarely	occasionally	usually	rarely	never	usually	always	occasionally	never	occasionally	never	never	always	never	never	always	never	never	never	never	never	never	never	never	rarely	occasionally	never	almost never/never	almost never/never	almost never/never	almost never/never	almost always/always	most of the time
138	(social) media	35	male	university degree	yes	once a week	0	usually	always	always	always	usually	sometimes	usually	always	always	always	always	never	always	never	never	always	usually	always	sometimes	always	never	never	always	never	always	usually	always	never	never	usually	never	never	never	never	usually	always	some of the time	some of the time	some of the time	almost never/never	almost always/always	most of the time
139	(social) media	30	male	apprenticeship	yes	daily	0	usually	sometimes	always	occasionally	usually	rarely	occasionally	always	always	rarely	usually	sometimes	always	occasionally	never	usually	occasionally	usually	rarely	sometimes	usually	occasionally	usually	never	rarely	usually	usually	sometimes	sometimes	rarely	usually	sometimes	occasionally	rarely	occasionally	usually	almost never/never	half of the time	most of the time	almost never/never	almost always/always	almost always/always
140	other	22	female	apprenticeship	yes	daily	0	usually	usually	usually	rarely	always	sometimes	never	always	usually	never	sometimes	sometimes	usually	occasionally	never	sometimes	usually	rarely	sometimes	rarely	sometimes	rarely	sometimes	sometimes	rarely	occasionally	sometimes	sometimes	rarely	occasionally	sometimes	rarely	rarely	never	occasionally	usually	some of the time	some of the time	some of the time	half of the time	most of the time	almost always/always
141	other	24	female	university degree	yes	once in a month	0	always	usually	usually	sometimes	usually	usually	sometimes	always	usually	usually	usually	usually	always	usually	usually	always	usually	usually	occasionally	sometimes	usually	sometimes	sometimes	always	sometimes	usually	always	sometimes	rarely	occasionally	rarely	occasionally	always	sometimes	usually	occasionally	half of the time	half of the time	half of the time	half of the time	most of the time	half of the time
142	other	24	male	higher college degree	yes	several times per week	7	usually	never	always	never	always	never	rarely	usually	sometimes	rarely	usually	rarely	always	never	never	sometimes	rarely	usually	rarely	rarely	rarely	never	always	sometimes	rarely	sometimes	usually	occasionally	sometimes	rarely	never	usually	rarely	rarely	rarely	always	almost never/never	some of the time	almost never/never	some of the time	almost always/always	most of the time
143	(social) media	21	female	apprenticeship	yes	daily	0	always	always	always	occasionally	rarely	usually	rarely	always	always	rarely	always	always	usually	occasionally	rarely	always	usually	always	usually	rarely	rarely	rarely	always	usually	usually	always	always	usually	usually	always	occasionally	sometimes	always	rarely	sometimes	usually	some of the time	most of the time	most of the time	most of the time	almost always/always	almost always/always
144	(social) media	21	male	apprenticeship	yes	once in a month	0	usually	usually	always	usually	always	usually	usually	always	always	usually	always	always	always	usually	sometimes	sometimes	sometimes	always	sometimes	always	always	always	always	occasionally	sometimes	always	usually	always	occasionally	occasionally	usually	usually	rarely	usually	rarely	usually	almost never/never	almost never/never	some of the time	almost never/never	almost always/always	half of the time
145	other	34	male	university degree	yes	several times per week	5	usually	always	always	usually	occasionally	usually	rarely	usually	always	never	usually	never	always	sometimes	always	usually	rarely	usually	usually	rarely	always	usually	sometimes	sometimes	usually	usually	usually	rarely	usually	rarely	rarely	never	rarely	rarely	rarely	usually	almost never/never	almost never/never	almost never/never	almost never/never	most of the time	most of the time
146	letter	28	male	university degree	yes	once in a month	0	usually	always	always	always	rarely	usually	usually	always	usually	always	usually	rarely	always	never	never	always	sometimes	usually	rarely	sometimes	rarely	rarely	usually	occasionally	usually	occasionally	usually	sometimes	occasionally	sometimes	usually	occasionally	rarely	usually	sometimes	rarely	almost never/never	almost never/never	some of the time	almost never/never	almost always/always	most of the time
147	other	30	male	university degree	yes	once in a month	0	sometimes	always	always	always	always	rarely	always	always	usually	always	always	usually	always	usually	rarely	always	sometimes	always	rarely	always	usually	always	always	sometimes	always	usually	never	usually	occasionally	usually	usually	always	usually	always	sometimes	always	almost never/never	almost never/never	almost never/never	almost never/never	almost always/always	almost always/always
148	letter	48	male	higher college degree	yes	several times per week	5	usually	always	always	always	always	usually	sometimes	usually	usually	sometimes	usually	usually	always	usually	rarely	rarely	sometimes	usually	usually	sometimes	sometimes	always	usually	never	sometimes	usually	always	sometimes	usually	sometimes	sometimes	usually	never	occasionally	sometimes	usually	some of the time	some of the time	some of the time	some of the time	most of the time	most of the time
149	(social) media	53	female	university degree	yes	once a week	0	always	always	always	always	always	always	always	always	always	always	always	always	always	always	always	always	usually	always	always	always	usually	always	always	always	always	always	always	usually	always	always	usually	always	always	always	always	always	almost never/never	some of the time	almost never/never	almost never/never	most of the time	almost never/never
150	letter	32	female	apprenticeship	yes	daily	0	never	usually	always	never	usually	usually	never	always	always	rarely	sometimes	sometimes	always	rarely	never	always	never	usually	sometimes	rarely	sometimes	always	always	never	rarely	always	always	rarely	sometimes	sometimes	usually	sometimes	always	rarely	always	sometimes	almost never/never	some of the time	half of the time	almost never/never	some of the time	almost never/never
151	letter	21	female	high school degree	yes	once in a month	0	always	usually	always	sometimes	always	always	sometimes	always	usually	always	usually	always	always	usually	always	always	rarely	always	rarely	usually	always	sometimes	usually	sometimes	sometimes	usually	usually	usually	sometimes	sometimes	rarely	usually	occasionally	sometimes	occasionally	sometimes	half of the time	almost never/never	almost never/never	almost never/never	most of the time	half of the time
152	letter	24	male	apprenticeship	yes	once in a month	0	usually	always	always	usually	usually	usually	always	always	sometimes	usually	always	always	always	always	rarely	always	occasionally	always	usually	usually	usually	usually	always	sometimes	sometimes	usually	always	usually	sometimes	usually	usually	usually	sometimes	usually	sometimes	always	almost never/never	almost never/never	almost never/never	almost never/never	almost always/always	almost always/always
153	(social) media	36	female	higher college degree	yes	once a week	0	always	always	always	usually	always	always	usually	always	always	usually	always	always	always	sometimes	never	always	always	always	always	usually	sometimes	always	always	usually	always	always	usually	always	always	always	always	always	never	usually	usually	always	almost never/never	almost never/never	almost never/never	almost never/never	most of the time	most of the time
154	letter	36	male	university degree	yes	once in a month	0	usually	always	always	sometimes	always	always	usually	always	always	usually	always	occasionally	always	occasionally	sometimes	always	usually	always	usually	always	occasionally	sometimes	always	occasionally	sometimes	usually	usually	usually	always	rarely	sometimes	usually	sometimes	sometimes	sometimes	always	almost never/never	some of the time	some of the time	almost never/never	most of the time	most of the time
155	letter	23	female	apprenticeship	yes	once in a month	0	usually	always	always	always	always	always	usually	always	usually	always	always	never	always	sometimes	always	always	usually	always	usually	always	never	always	always	always	usually	usually	always	sometimes	sometimes	sometimes	sometimes	usually	always	usually	sometimes	always	some of the time	almost never/never	almost never/never	some of the time	almost always/always	almost always/always
156	letter	58	male	high school degree	yes	once a week	0	usually	always	always	sometimes	never	usually	occasionally	never	usually	occasionally	always	always	usually	always	occasionally	occasionally	always	usually	always	usually	sometimes	always	always	always	usually	usually	always	usually	usually	always	never	always	usually	always	always	usually	almost never/never	almost never/never	some of the time	almost never/never	almost always/always	most of the time
157	(social) media	66	male	higher college degree	yes	once a week	0	usually	always	never	occasionally	always	always	usually	always	always	always	always	always	always	always	always	usually	usually	always	sometimes	always	usually	usually	always	usually	always	usually	always	always	usually	always	usually	always	usually	always	usually	always	some of the time	some of the time	almost never/never	almost never/never	almost always/always	most of the time
158	(social) media	16	female	high school degree	yes	once in a month	0	always	usually	always	always	always	always	always	always	usually	always	always	always	sometimes	sometimes	never	always	sometimes	always	usually	always	sometimes	rarely	sometimes	occasionally	usually	rarely	always	sometimes	usually	always	rarely	always	sometimes	always	usually	usually	almost never/never	some of the time	some of the time	some of the time	almost always/always	almost always/always
159	(social) media	26	male	higher college degree	yes	daily	0	never	always	always	never	sometimes	sometimes	rarely	always	sometimes	occasionally	sometimes	occasionally	always	sometimes	never	usually	never	rarely	sometimes	sometimes	usually	never	occasionally	never	never	rarely	usually	never	rarely	occasionally	never	rarely	rarely	occasionally	occasionally	usually	some of the time	almost never/never	some of the time	almost never/never	almost always/always	almost always/always
160	other	54	female	apprenticeship	yes	several times per week	2	rarely	usually	sometimes	rarely	never	usually	sometimes	never	always	usually	usually	occasionally	always	sometimes	never	always	sometimes	never	occasionally	sometimes	never	never	usually	sometimes	usually	sometimes	occasionally	sometimes	occasionally	never	occasionally	rarely	rarely	sometimes	sometimes	never	most of the time	most of the time	half of the time	almost never/never	almost always/always	almost always/always
161	letter	37	female	higher college degree	yes	several times per week	5	always	usually	always	always	always	always	sometimes	always	always	sometimes	always	always	always	always	always	always	always	always	always	always	always	always	always	always	always	always	always	always	always	always	always	always	always	occasionally	usually	always	some of the time	almost never/never	almost never/never	almost never/never	most of the time	almost always/always
162	letter	31	female	university degree	yes	daily	0	usually	usually	always	sometimes	always	never	never	always	always	never	always	never	always	never	never	always	usually	usually	occasionally	rarely	never	rarely	usually	never	usually	always	always	rarely	rarely	occasionally	never	sometimes	always	never	sometimes	always	almost never/never	some of the time	some of the time	almost never/never	almost always/always	almost always/always
163	letter	35	male	higher college degree	yes	daily	0	always	always	usually	rarely	never	usually	never	never	always	never	never	always	rarely	always	never	always	never	never	occasionally	never	sometimes	sometimes	never	always	usually	rarely	always	never	usually	occasionally	never	always	usually	never	always	never	some of the time	most of the time	almost never/never	almost never/never	almost always/always	almost always/always
164	(social) media	24	female	university degree	yes	once in a month	0	usually	usually	always	always	always	always	sometimes	always	usually	usually	always	never	always	usually	usually	usually	usually	always	occasionally	usually	always	always	always	never	always	sometimes	usually	usually	sometimes	rarely	never	usually	rarely	sometimes	usually	always	almost never/never	almost never/never	almost never/never	almost never/never	almost always/always	almost always/always
165	letter	23	male	higher college degree	yes	once in a month	0	occasionally	usually	usually	occasionally	sometimes	usually	rarely	always	usually	always	usually	usually	always	usually	always	always	occasionally	always	sometimes	always	never	never	rarely	sometimes	usually	occasionally	usually	sometimes	sometimes	sometimes	occasionally	sometimes	rarely	occasionally	sometimes	usually	almost never/never	almost never/never	almost never/never	almost never/never	most of the time	almost always/always
166	(social) media	21	male	apprenticeship	yes	once in a month	0	usually	always	always	always	always	always	usually	always	always	always	usually	occasionally	always	usually	sometimes	always	occasionally	always	sometimes	usually	usually	always	always	rarely	usually	sometimes	sometimes	never	sometimes	sometimes	occasionally	usually	sometimes	usually	usually	usually	almost never/never	almost never/never	almost never/never	almost never/never	half of the time	almost always/always
167	other	28	male	university degree	yes	daily	0	sometimes	usually	usually	occasionally	usually	usually	never	usually	sometimes	never	never	usually	always	occasionally	never	always	never	occasionally	usually	rarely	rarely	never	usually	never	never	sometimes	usually	never	sometimes	occasionally	usually	rarely	never	rarely	rarely	usually	half of the time	most of the time	half of the time	some of the time	almost always/always	almost always/always
168	(social) media	36	male	apprenticeship	yes	daily	0	usually	never	rarely	rarely	rarely	rarely	rarely	rarely	usually	rarely	rarely	occasionally	usually	rarely	rarely	rarely	rarely	never	rarely	occasionally	never	never	occasionally	never	never	always	always	rarely	never	never	never	never	rarely	rarely	rarely	rarely	some of the time	some of the time	some of the time	almost never/never	most of the time	most of the time
169	letter	56	female	higher college degree	yes	daily	0	always	rarely	always	never	usually	usually	never	usually	always	rarely	rarely	never	always	never	never	never	never	never	usually	never	never	never	rarely	never	never	2.91675	occasionally	never	usually	never	never	never	never	rarely	occasionally	occasionally	most of the time	almost always/always	almost never/never	almost never/never	most of the time	some of the time
170	(social) media	29	female	university degree	yes	once in a month	0	occasionally	never	usually	never	never	always	usually	usually	never	usually	sometimes	never	occasionally	rarely	occasionally	always	never	always	occasionally	always	2.44578	usually	usually	never	never	usually	usually	sometimes	rarely	rarely	never	never	never	never	usually	occasionally	almost never/never	half of the time	almost never/never	almost never/never	most of the time	most of the time
171	letter	26	male	university degree	yes	daily	0	always	rarely	usually	always	never	rarely	never	always	always	never	usually	always	always	always	usually	always	usually	usually	sometimes	usually	never	always	always	usually	usually	always	always	rarely	rarely	usually	always	rarely	usually	usually	usually	usually	almost never/never	some of the time	some of the time	almost never/never	some of the time	some of the time
172	(social) media	23	male	high school degree	yes	several times per week	4	usually	usually	usually	usually	rarely	rarely	rarely	usually	usually	sometimes	rarely	rarely	usually	never	rarely	rarely	never	always	never	usually	rarely	rarely	always	usually	rarely	never	rarely	never	sometimes	occasionally	usually	never	never	sometimes	rarely	sometimes	some of the time	almost never/never	almost never/never	some of the time	almost always/always	almost always/always
173	(social) media	21	female	high school degree	yes	once in a month	0	always	usually	always	sometimes	always	usually	usually	always	always	always	usually	sometimes	always	rarely	occasionally	always	sometimes	always	usually	always	occasionally	rarely	always	never	never	sometimes	always	usually	usually	usually	usually	rarely	sometimes	usually	sometimes	always	half of the time	some of the time	some of the time	half of the time	half of the time	almost always/always
174	other	38	male	university degree	yes	once in a month	0	always	usually	always	always	usually	usually	usually	usually	always	always	always	always	always	sometimes	usually	always	sometimes	always	rarely	usually	always	usually	usually	rarely	always	usually	usually	usually	usually	usually	rarely	always	sometimes	always	usually	always	almost never/never	almost never/never	almost never/never	almost never/never	most of the time	some of the time
175	letter	27	male	higher college degree	yes	once in a month	0	never	always	always	never	always	always	always	always	always	always	always	never	always	always	always	never	never	always	usually	always	never	always	always	usually	always	sometimes	always	sometimes	sometimes	sometimes	never	always	never	always	usually	usually	almost never/never	almost never/never	almost never/never	almost never/never	almost always/always	some of the time
176	letter	40	male	apprenticeship	yes	daily	0	never	sometimes	never	never	never	sometimes	never	rarely	always	never	never	usually	rarely	never	never	never	never	never	never	never	never	never	never	never	never	never	never	never	never	never	never	never	never	never	never	never	almost never/never	almost never/never	some of the time	almost never/never	almost always/always	most of the time
177	other	22	male	apprenticeship	yes	daily	0	usually	sometimes	never	rarely	sometimes	never	never	sometimes	always	rarely	usually	always	always	never	sometimes	never	never	never	never	sometimes	sometimes	never	usually	never	never	never	never	rarely	rarely	never	never	never	never	never	never	sometimes	almost never/never	some of the time	almost never/never	almost never/never	almost always/always	almost always/always
178	(social) media	20	male	high school degree	yes	once a week	0	usually	usually	always	usually	always	sometimes	usually	usually	always	usually	usually	always	always	occasionally	rarely	sometimes	sometimes	sometimes	sometimes	usually	usually	usually	usually	never	sometimes	rarely	always	always	occasionally	sometimes	usually	sometimes	rarely	usually	sometimes	usually	almost never/never	almost never/never	almost never/never	some of the time	almost always/always	almost always/always
179	(social) media	43	male	university degree	yes	daily	0	never	never	always	usually	never	usually	never	always	always	never	always	always	always	always	never	always	usually	always	usually	never	never	never	usually	usually	usually	usually	usually	rarely	never	always	always	never	never	occasionally	usually	rarely	almost never/never	almost never/never	some of the time	almost never/never	almost always/always	almost always/always
180	(social) media	31	male	university degree	yes	once in a month	0	usually	always	always	usually	usually	sometimes	usually	always	usually	always	always	always	always	sometimes	occasionally	always	usually	usually	sometimes	always	sometimes	rarely	always	occasionally	sometimes	usually	usually	usually	rarely	occasionally	never	usually	never	sometimes	usually	usually	almost never/never	almost never/never	some of the time	almost never/never	half of the time	most of the time
181	letter	18	male	high school degree	yes	several times per week	4	sometimes	usually	usually	always	always	usually	occasionally	always	always	sometimes	usually	always	always	usually	never	rarely	sometimes	always	rarely	sometimes	rarely	rarely	usually	never	rarely	always	usually	sometimes	never	usually	always	usually	occasionally	occasionally	occasionally	always	almost never/never	almost never/never	almost never/never	almost never/never	most of the time	most of the time
182	(social) media	21	male	high school degree	yes	several times per week	2	usually	usually	always	sometimes	occasionally	usually	usually	always	usually	rarely	usually	usually	always	occasionally	occasionally	always	sometimes	always	occasionally	occasionally	rarely	usually	usually	usually	occasionally	rarely	usually	rarely	sometimes	sometimes	occasionally	sometimes	rarely	occasionally	occasionally	always	some of the time	almost never/never	some of the time	some of the time	almost always/always	almost always/always
183	(social) media	32	male	university degree	yes	daily	0	usually	sometimes	always	never	usually	always	never	usually	usually	never	usually	always	always	never	never	never	usually	never	usually	rarely	never	never	always	never	rarely	never	never	never	usually	never	rarely	never	never	never	occasionally	never	almost never/never	some of the time	almost never/never	almost never/never	most of the time	half of the time
184	letter	29	female	higher college degree	yes	once in a month	0	usually	rarely	never	never	rarely	rarely	occasionally	never	rarely	never	never	never	never	never	never	never	rarely	never	rarely	never	never	never	never	never	never	never	never	never	never	rarely	never	never	never	never	never	never	almost never/never	almost never/never	almost never/never	almost never/never	some of the time	some of the time
185	letter	47	male	university degree	yes	several times per week	6	usually	usually	never	never	never	always	rarely	always	rarely	sometimes	sometimes	sometimes	never	occasionally	never	rarely	occasionally	always	sometimes	rarely	rarely	always	usually	sometimes	never	rarely	always	rarely	occasionally	occasionally	always	never	usually	sometimes	sometimes	sometimes	almost always/always	some of the time	almost always/always	almost always/always	almost always/always	half of the time
186	(social) media	51	male	university degree	yes	daily	0	rarely	usually	usually	usually	always	rarely	rarely	always	always	never	never	always	always	usually	usually	always	never	always	rarely	usually	never	usually	usually	usually	usually	always	always	sometimes	usually	usually	rarely	sometimes	usually	sometimes	always	usually	almost never/never	almost never/never	almost never/never	almost never/never	some of the time	most of the time
187	letter	22	male	university degree	yes	several times per week	4	usually	usually	usually	occasionally	always	rarely	rarely	always	always	occasionally	usually	always	always	occasionally	never	usually	sometimes	always	rarely	occasionally	usually	usually	always	never	sometimes	sometimes	usually	always	never	usually	never	always	never	occasionally	always	sometimes	half of the time	some of the time	almost never/never	some of the time	most of the time	some of the time
188	letter	20	male	high school degree	yes	once in a month	0	always	usually	usually	always	always	usually	sometimes	always	always	always	always	always	always	usually	always	always	usually	always	usually	always	always	usually	always	always	always	usually	always	usually	occasionally	usually	occasionally	always	always	always	always	usually	almost never/never	almost never/never	almost never/never	almost never/never	almost always/always	most of the time
189	letter	55	female	higher college degree	yes	several times per week	4	never	never	always	never	always	always	never	always	always	never	never	never	always	always	usually	always	sometimes	always	always	sometimes	rarely	usually	rarely	always	always	always	never	usually	always	sometimes	always	always	always	never	always	sometimes	almost never/never	almost never/never	almost never/never	almost never/never	almost never/never	almost never/never
190	letter	26	male	higher college degree	yes	daily	0	usually	sometimes	always	rarely	rarely	rarely	rarely	always	usually	never	usually	usually	usually	always	never	always	rarely	always	rarely	always	usually	always	usually	rarely	usually	always	usually	occasionally	occasionally	usually	usually	usually	usually	occasionally	rarely	always	almost never/never	some of the time	half of the time	almost never/never	almost always/always	almost always/always
191	other	56	female	university degree	yes	daily	0	usually	never	never	never	never	never	never	never	always	never	sometimes	usually	never	never	never	always	never	never	never	never	never	always	never	always	always	always	always	always	always	always	never	never	always	never	never	never	almost never/never	almost never/never	almost never/never	almost never/never	almost never/never	almost never/never
192	(social) media	50	male	apprenticeship	yes	daily	0	always	usually	always	always	usually	always	never	sometimes	always	rarely	usually	always	always	usually	never	always	sometimes	always	sometimes	sometimes	never	sometimes	always	never	rarely	always	never	never	sometimes	rarely	never	usually	never	rarely	usually	occasionally	almost never/never	almost never/never	some of the time	almost never/never	most of the time	half of the time
193	letter	38	male	higher college degree	yes	once in a month	0	usually	always	always	always	usually	usually	usually	usually	rarely	usually	always	rarely	always	never	never	always	usually	usually	usually	usually	sometimes	usually	always	never	sometimes	always	sometimes	usually	usually	sometimes	rarely	rarely	rarely	usually	rarely	always	almost never/never	almost never/never	some of the time	almost never/never	almost always/always	most of the time
194	(social) media	42	male	higher college degree	yes	once a week	0	usually	always	always	never	never	never	never	never	always	never	never	always	never	never	occasionally	never	always	never	never	never	never	never	always	never	never	never	never	never	never	never	never	never	never	always	never	never	almost never/never	almost never/never	almost never/never	almost never/never	almost always/always	some of the time
195	letter	64	female	higher college degree	yes	daily	0	always	sometimes	always	usually	usually	usually	never	usually	always	never	rarely	sometimes	always	rarely	3.01594	always	usually	3.30917	usually	rarely	never	never	usually	never	occasionally	usually	usually	never	usually	usually	usually	occasionally	never	never	usually	sometimes	almost never/never	some of the time	some of the time	almost never/never	almost always/always	most of the time
196	(social) media	22	male	high school degree	yes	several times per week	2	always	always	always	usually	usually	usually	usually	always	always	usually	always	always	always	always	usually	always	usually	always	usually	usually	rarely	always	always	sometimes	usually	sometimes	always	sometimes	usually	sometimes	always	always	usually	sometimes	usually	always	almost never/never	some of the time	almost never/never	almost never/never	almost always/always	almost always/always
197	letter	22	male	apprenticeship	yes	once in a month	0	always	always	always	always	always	always	always	always	always	always	usually	always	always	usually	always	always	occasionally	always	sometimes	occasionally	always	usually	always	never	always	usually	usually	usually	usually	always	occasionally	always	usually	usually	usually	usually	almost never/never	almost never/never	almost never/never	almost never/never	most of the time	half of the time
198	(social) media	21	female	high school degree	yes	once in a month	0	always	usually	always	usually	always	usually	rarely	always	always	always	rarely	rarely	always	sometimes	always	always	usually	always	sometimes	usually	occasionally	usually	usually	sometimes	usually	occasionally	always	sometimes	rarely	sometimes	rarely	always	occasionally	always	usually	usually	almost never/never	almost never/never	some of the time	almost never/never	most of the time	most of the time
199	(social) media	26	male	apprenticeship	yes	once a week	0	occasionally	always	always	usually	usually	usually	usually	always	usually	usually	usually	always	always	usually	occasionally	usually	usually	always	usually	always	usually	always	always	usually	usually	usually	usually	usually	usually	usually	sometimes	usually	sometimes	always	usually	always	almost never/never	some of the time	almost never/never	almost never/never	almost always/always	almost always/always
200	other	31	male	university degree	yes	daily	0	usually	usually	always	usually	never	rarely	never	always	usually	rarely	always	never	rarely	occasionally	never	usually	rarely	usually	occasionally	rarely	never	usually	sometimes	rarely	rarely	usually	usually	rarely	rarely	rarely	rarely	sometimes	rarely	rarely	sometimes	sometimes	almost never/never	most of the time	some of the time	almost never/never	almost always/always	almost always/always
201	letter	27	male	higher college degree	yes	once in a month	0	usually	usually	always	always	usually	sometimes	usually	always	always	usually	always	always	always	usually	always	usually	occasionally	always	occasionally	usually	always	always	usually	rarely	occasionally	sometimes	sometimes	always	occasionally	usually	sometimes	always	never	always	usually	usually	some of the time	almost never/never	almost never/never	almost never/never	almost always/always	half of the time
202	other	50	male	university degree	yes	daily	0	never	always	always	never	rarely	always	never	occasionally	usually	never	usually	occasionally	always	never	never	rarely	never	never	always	never	never	always	always	never	never	occasionally	never	never	always	never	never	never	usually	never	always	rarely	almost never/never	almost never/never	almost never/never	almost never/never	almost always/always	almost always/always
203	(social) media	30	male	university degree	yes	once in a month	0	sometimes	always	always	usually	usually	usually	occasionally	always	usually	usually	always	always	always	always	never	rarely	usually	always	usually	usually	usually	usually	usually	usually	usually	usually	usually	usually	usually	usually	usually	usually	always	sometimes	usually	usually	almost never/never	almost never/never	some of the time	almost never/never	almost always/always	most of the time
204	(social) media	22	female	higher college degree	yes	daily	0	always	sometimes	always	never	rarely	never	rarely	always	usually	rarely	usually	sometimes	always	rarely	never	never	usually	sometimes	usually	usually	rarely	usually	usually	occasionally	usually	usually	always	rarely	sometimes	rarely	usually	sometimes	rarely	rarely	sometimes	occasionally	almost never/never	almost never/never	some of the time	almost never/never	most of the time	most of the time
205	other	31	male	university degree	yes	daily	0	usually	usually	always	sometimes	sometimes	sometimes	never	always	usually	never	usually	rarely	usually	usually	occasionally	always	sometimes	always	never	never	usually	sometimes	usually	occasionally	sometimes	always	always	rarely	never	always	sometimes	occasionally	usually	never	usually	rarely	almost never/never	almost never/never	almost never/never	almost never/never	almost always/always	some of the time
206	other	20	male	apprenticeship	yes	daily	0	occasionally	rarely	rarely	never	never	never	never	always	always	never	occasionally	usually	never	never	occasionally	never	never	never	never	never	never	never	never	never	never	never	never	never	never	never	never	never	never	never	never	never	some of the time	most of the time	most of the time	almost never/never	almost always/always	almost always/always
207	(social) media	45	male	apprenticeship	yes	once a week	0	occasionally	never	always	never	usually	always	always	usually	always	always	never	never	always	never	usually	always	never	never	rarely	never	never	never	never	never	never	usually	always	never	rarely	never	always	never	never	never	never	never	almost never/never	almost never/never	almost never/never	almost never/never	almost always/always	almost always/always
208	(social) media	36	female	university degree	yes	once a week	0	usually	usually	always	sometimes	always	usually	sometimes	always	always	usually	usually	usually	always	usually	usually	always	usually	always	usually	always	sometimes	always	always	rarely	rarely	sometimes	usually	occasionally	usually	rarely	rarely	sometimes	occasionally	usually	occasionally	always	some of the time	almost never/never	almost never/never	some of the time	most of the time	most of the time
209	letter	44	female	higher college degree	yes	daily	0	occasionally	occasionally	usually	rarely	occasionally	rarely	rarely	always	always	rarely	usually	usually	usually	usually	rarely	rarely	sometimes	usually	rarely	rarely	rarely	usually	rarely	rarely	usually	always	usually	occasionally	rarely	sometimes	usually	rarely	usually	occasionally	usually	usually	half of the time	most of the time	half of the time	almost never/never	most of the time	some of the time
210	(social) media	42	male	higher college degree	yes	once a week	0	rarely	always	always	usually	always	always	usually	always	always	usually	always	always	always	always	always	always	always	always	always	always	always	always	always	always	always	always	always	usually	usually	always	always	usually	always	always	always	always	some of the time	some of the time	some of the time	some of the time	almost always/always	almost never/never
211	(social) media	22	male	high school degree	yes	once a week	0	usually	usually	always	always	rarely	rarely	sometimes	always	usually	usually	always	rarely	usually	occasionally	rarely	always	occasionally	always	never	usually	rarely	sometimes	always	never	sometimes	rarely	usually	sometimes	usually	never	rarely	usually	never	sometimes	rarely	sometimes	almost never/never	almost never/never	almost never/never	some of the time	almost always/always	almost always/always
212	letter	50	male	higher college degree	yes	several times per week	4	always	usually	always	rarely	always	always	sometimes	always	always	occasionally	always	always	always	usually	occasionally	always	usually	usually	usually	usually	rarely	always	usually	always	sometimes	always	always	usually	usually	sometimes	never	usually	never	occasionally	usually	usually	almost never/never	most of the time	almost never/never	almost never/never	almost always/always	almost always/always
213	(social) media	18	female	apprenticeship	yes	several times per week	4	usually	usually	always	sometimes	occasionally	occasionally	sometimes	never	usually	sometimes	usually	sometimes	always	sometimes	rarely	always	sometimes	occasionally	usually	usually	sometimes	sometimes	usually	rarely	rarely	usually	usually	usually	usually	sometimes	sometimes	sometimes	occasionally	rarely	sometimes	usually	some of the time	some of the time	almost never/never	some of the time	half of the time	half of the time
214	letter	27	male	university degree	yes	several times per week	4	usually	usually	usually	usually	always	sometimes	sometimes	always	always	rarely	usually	always	always	usually	never	never	sometimes	never	occasionally	sometimes	rarely	never	usually	never	rarely	always	sometimes	occasionally	rarely	usually	never	never	usually	sometimes	rarely	usually	some of the time	some of the time	almost never/never	almost never/never	most of the time	most of the time
215	letter	41	male	university degree	yes	several times per week	2	usually	always	always	usually	never	usually	occasionally	always	usually	occasionally	always	never	always	usually	never	always	usually	always	usually	always	occasionally	never	always	occasionally	always	usually	always	usually	usually	usually	sometimes	always	rarely	sometimes	sometimes	always	almost never/never	some of the time	almost never/never	almost never/never	almost always/always	almost always/always
216	other	23	male	apprenticeship	yes	once a week	0	always	always	usually	usually	usually	usually	usually	always	always	rarely	sometimes	always	always	never	never	always	rarely	always	sometimes	sometimes	sometimes	rarely	always	never	sometimes	usually	always	usually	usually	usually	usually	always	sometimes	rarely	sometimes	always	almost never/never	some of the time	almost never/never	almost never/never	most of the time	some of the time
217	(social) media	34	female	higher college degree	yes	daily	0	always	usually	always	occasionally	always	sometimes	sometimes	always	usually	sometimes	always	always	always	never	rarely	usually	rarely	always	usually	always	rarely	always	always	occasionally	usually	usually	always	sometimes	rarely	rarely	rarely	rarely	rarely	occasionally	rarely	usually	almost never/never	some of the time	some of the time	almost never/never	most of the time	most of the time
218	other	16	female	higher college degree	yes	once a week	0	always	usually	usually	occasionally	always	always	usually	always	usually	occasionally	rarely	usually	always	never	usually	sometimes	occasionally	always	usually	occasionally	never	always	sometimes	sometimes	always	rarely	usually	occasionally	rarely	sometimes	usually	usually	rarely	never	rarely	always	most of the time	some of the time	half of the time	most of the time	almost always/always	some of the time
219	other	40	male	apprenticeship	yes	daily	0	usually	usually	always	always	never	always	always	never	always	never	always	never	always	occasionally	never	never	always	always	occasionally	never	never	always	always	always	never	always	always	always	never	never	always	always	always	never	never	never	almost never/never	almost never/never	almost never/never	almost never/never	almost always/always	almost always/always
220	letter	24	male	university degree	yes	several times per week	2	usually	always	always	always	always	sometimes	sometimes	always	always	sometimes	usually	always	always	rarely	never	never	sometimes	always	never	always	sometimes	usually	always	never	always	usually	usually	occasionally	sometimes	rarely	usually	always	usually	sometimes	sometimes	always	almost never/never	almost never/never	almost never/never	almost never/never	most of the time	almost always/always
221	letter	29	female	higher college degree	yes	several times per week	6	sometimes	usually	always	always	always	always	sometimes	always	always	rarely	always	always	usually	always	never	always	usually	always	always	always	rarely	always	always	never	always	always	usually	usually	usually	usually	always	always	always	sometimes	always	always	almost never/never	most of the time	almost never/never	almost never/never	some of the time	some of the time
222	letter	22	female	high school degree	yes	daily	0	sometimes	usually	always	rarely	rarely	always	never	always	usually	never	usually	always	always	sometimes	never	rarely	sometimes	usually	occasionally	occasionally	rarely	sometimes	usually	rarely	occasionally	usually	usually	occasionally	sometimes	rarely	rarely	rarely	usually	never	occasionally	sometimes	some of the time	some of the time	some of the time	almost never/never	almost always/always	most of the time
223	letter	25	male	higher college degree	yes	once in a month	0	always	always	always	always	always	always	always	always	always	always	always	always	always	never	rarely	never	usually	always	usually	always	always	always	always	never	always	always	always	usually	always	usually	occasionally	always	never	never	usually	always	almost never/never	almost never/never	almost never/never	almost never/never	almost never/never	almost never/never
224	(social) media	26	male	apprenticeship	yes	several times per week	3	usually	always	always	always	always	sometimes	usually	always	always	sometimes	always	always	always	sometimes	sometimes	always	sometimes	always	sometimes	usually	always	always	always	usually	always	always	always	usually	usually	usually	always	always	always	sometimes	sometimes	always	almost never/never	almost never/never	almost never/never	almost never/never	most of the time	most of the time
225	letter	30	female	university degree	yes	several times per week	4	occasionally	always	always	sometimes	always	always	sometimes	always	always	rarely	always	rarely	always	rarely	occasionally	always	usually	always	usually	usually	occasionally	always	always	usually	rarely	rarely	usually	sometimes	usually	rarely	always	sometimes	rarely	sometimes	sometimes	always	some of the time	some of the time	some of the time	half of the time	almost always/always	most of the time
226	(social) media	22	male	university degree	yes	several times per week	4	occasionally	usually	sometimes	rarely	never	never	sometimes	usually	usually	occasionally	usually	rarely	occasionally	never	rarely	sometimes	rarely	never	never	usually	occasionally	never	rarely	never	rarely	never	sometimes	rarely	never	never	rarely	never	never	occasionally	rarely	never	almost never/never	almost never/never	almost never/never	almost never/never	almost always/always	almost always/always
227	letter	21	female	apprenticeship	yes	once a week	0	always	never	always	always	sometimes	always	usually	always	always	always	always	never	always	always	usually	always	sometimes	always	usually	always	never	never	always	never	never	never	always	sometimes	usually	never	sometimes	usually	never	usually	usually	always	almost never/never	almost never/never	almost never/never	almost never/never	most of the time	almost always/always
228	letter	21	female	apprenticeship	yes	once a week	0	usually	always	always	usually	always	always	usually	always	always	always	always	always	always	usually	rarely	always	usually	always	usually	always	always	always	always	sometimes	always	always	usually	usually	usually	never	occasionally	always	sometimes	sometimes	sometimes	always	almost never/never	almost never/never	almost never/never	almost never/never	most of the time	most of the time
229	(social) media	21	female	higher college degree	yes	once in a month	0	usually	always	always	always	sometimes	sometimes	always	always	always	always	always	always	always	usually	rarely	always	always	always	rarely	always	always	always	always	always	always	always	always	always	occasionally	always	always	always	sometimes	always	always	always	almost never/never	almost never/never	almost never/never	almost never/never	most of the time	almost never/never
230	(social) media	18	female	high school degree	yes	once a week	0	usually	never	usually	usually	always	always	rarely	always	usually	sometimes	sometimes	rarely	usually	never	never	always	occasionally	always	rarely	occasionally	usually	always	usually	never	usually	occasionally	always	occasionally	sometimes	usually	occasionally	occasionally	never	sometimes	rarely	usually	almost never/never	some of the time	some of the time	almost never/never	almost always/always	almost always/always
231	other	34	female	apprenticeship	yes	several times per week	5	usually	always	always	usually	always	always	never	always	always	rarely	always	always	always	usually	rarely	usually	usually	usually	usually	rarely	rarely	always	always	usually	usually	always	always	always	usually	usually	always	usually	always	rarely	usually	always	almost never/never	almost never/never	almost never/never	some of the time	most of the time	some of the time
232	letter	31	male	university degree	yes	once a week	0	always	always	always	sometimes	occasionally	usually	usually	always	usually	always	always	rarely	always	sometimes	sometimes	always	usually	always	sometimes	always	sometimes	rarely	always	sometimes	sometimes	usually	usually	sometimes	rarely	usually	sometimes	usually	rarely	sometimes	usually	always	almost never/never	almost never/never	some of the time	almost never/never	almost always/always	almost always/always
233	letter	19	female	apprenticeship	yes	several times per week	4	usually	sometimes	usually	usually	usually	sometimes	rarely	always	usually	occasionally	usually	occasionally	always	sometimes	sometimes	usually	occasionally	usually	sometimes	occasionally	sometimes	usually	usually	sometimes	occasionally	usually	usually	sometimes	sometimes	sometimes	sometimes	usually	occasionally	rarely	usually	usually	some of the time	half of the time	some of the time	almost never/never	almost always/always	most of the time
234	(social) media	57	male	higher college degree	yes	daily	0	usually	sometimes	always	usually	usually	usually	never	usually	sometimes	never	usually	usually	always	rarely	never	usually	sometimes	usually	usually	usually	occasionally	never	usually	never	rarely	never	always	occasionally	always	never	sometimes	usually	rarely	sometimes	rarely	usually	almost never/never	most of the time	most of the time	almost never/never	almost always/always	most of the time
235	other	38	female	apprenticeship	yes	daily	0	sometimes	sometimes	occasionally	rarely	rarely	rarely	never	rarely	usually	rarely	never	rarely	occasionally	rarely	rarely	sometimes	rarely	rarely	rarely	never	rarely	rarely	rarely	rarely	sometimes	usually	sometimes	rarely	rarely	rarely	rarely	never	never	never	rarely	rarely	most of the time	almost always/always	almost always/always	most of the time	almost always/always	almost always/always
236	(social) media	50	male	apprenticeship	yes	daily	0	rarely	occasionally	occasionally	always	always	rarely	never	always	always	rarely	rarely	never	rarely	always	rarely	always	never	rarely	rarely	occasionally	rarely	always	rarely	always	always	always	never	rarely	always	always	rarely	rarely	always	rarely	always	rarely	almost never/never	almost never/never	almost never/never	almost never/never	almost never/never	almost never/never
237	other	26	male	university degree	yes	several times per week	1	usually	always	sometimes	sometimes	always	rarely	usually	always	sometimes	usually	always	always	sometimes	occasionally	rarely	sometimes	occasionally	always	rarely	usually	always	usually	occasionally	never	occasionally	usually	occasionally	usually	occasionally	rarely	rarely	rarely	never	rarely	rarely	occasionally	some of the time	some of the time	almost never/never	almost never/never	almost always/always	almost always/always
238	letter	54	female	apprenticeship	yes	several times per week	6	rarely	always	always	sometimes	always	always	rarely	always	usually	occasionally	occasionally	always	always	always	never	always	rarely	always	always	sometimes	sometimes	always	usually	usually	sometimes	always	always	rarely	always	always	always	sometimes	always	occasionally	always	always	some of the time	some of the time	some of the time	almost never/never	almost always/always	some of the time
239	letter	28	female	higher college degree	yes	several times per week	2	usually	always	always	usually	always	never	sometimes	always	always	sometimes	always	never	always	always	usually	never	always	always	never	occasionally	rarely	usually	always	usually	occasionally	always	always	sometimes	occasionally	occasionally	usually	always	usually	usually	always	usually	almost never/never	almost always/always	almost never/never	almost never/never	almost always/always	some of the time
240	(social) media	21	female	high school degree	yes	once a week	0	usually	always	always	usually	usually	always	occasionally	always	usually	rarely	usually	always	always	usually	usually	always	usually	always	usually	usually	always	rarely	always	always	usually	always	sometimes	never	usually	usually	usually	sometimes	usually	usually	sometimes	sometimes	some of the time	almost never/never	some of the time	almost never/never	almost always/always	almost always/always
241	letter	34	female	university degree	yes	daily	0	usually	usually	occasionally	occasionally	occasionally	occasionally	never	usually	always	never	sometimes	always	usually	never	never	always	rarely	usually	usually	occasionally	rarely	never	sometimes	never	usually	usually	usually	rarely	rarely	usually	always	rarely	rarely	occasionally	usually	usually	some of the time	some of the time	some of the time	some of the time	almost always/always	almost always/always
242	letter	19	male	high school degree	yes	once a week	0	usually	usually	always	sometimes	sometimes	usually	usually	always	usually	always	usually	occasionally	always	always	rarely	always	occasionally	always	sometimes	always	rarely	always	always	never	occasionally	always	usually	sometimes	occasionally	rarely	sometimes	usually	usually	always	usually	rarely	some of the time	half of the time	half of the time	half of the time	almost always/always	most of the time
243	other	30	male	higher college degree	yes	several times per week	3	usually	always	always	usually	sometimes	sometimes	usually	always	usually	usually	always	always	always	never	rarely	rarely	usually	always	sometimes	usually	never	rarely	always	usually	sometimes	sometimes	rarely	occasionally	occasionally	never	always	sometimes	usually	rarely	sometimes	always	some of the time	almost never/never	almost never/never	almost never/never	almost always/always	almost always/always
244	other	20	male	high school degree	yes	once in a month	0	always	usually	always	usually	always	usually	usually	always	usually	usually	usually	usually	always	usually	usually	never	sometimes	usually	occasionally	sometimes	usually	occasionally	always	sometimes	usually	sometimes	sometimes	occasionally	sometimes	sometimes	usually	usually	occasionally	usually	usually	usually	some of the time	some of the time	some of the time	some of the time	most of the time	most of the time
245	(social) media	48	male	higher college degree	yes	daily	0	usually	rarely	sometimes	rarely	occasionally	sometimes	never	rarely	always	never	rarely	always	sometimes	usually	never	always	rarely	never	sometimes	rarely	sometimes	usually	rarely	never	rarely	usually	sometimes	never	usually	always	usually	occasionally	usually	rarely	usually	rarely	some of the time	some of the time	half of the time	some of the time	almost always/always	some of the time
246	(social) media	21	male	apprenticeship	yes	several times per week	2	usually	always	always	sometimes	always	usually	usually	always	always	sometimes	usually	always	always	sometimes	sometimes	usually	usually	usually	occasionally	usually	sometimes	usually	always	rarely	rarely	sometimes	usually	usually	usually	usually	never	never	rarely	occasionally	never	usually	half of the time	some of the time	half of the time	some of the time	almost always/always	almost always/always
247	(social) media	32	male	higher college degree	yes	daily	0	occasionally	always	sometimes	rarely	occasionally	rarely	rarely	always	usually	never	occasionally	usually	always	rarely	never	usually	never	never	occasionally	occasionally	never	rarely	usually	occasionally	rarely	usually	always	rarely	sometimes	rarely	sometimes	rarely	usually	rarely	usually	rarely	almost never/never	almost never/never	almost never/never	almost never/never	almost always/always	most of the time
248	(social) media	26	female	higher college degree	yes	several times per week	3	rarely	always	always	sometimes	always	sometimes	usually	always	always	occasionally	usually	usually	always	rarely	never	always	occasionally	usually	sometimes	sometimes	never	rarely	always	sometimes	rarely	always	occasionally	rarely	sometimes	rarely	rarely	rarely	always	occasionally	occasionally	always	some of the time	some of the time	almost never/never	some of the time	most of the time	most of the time
249	(social) media	25	male	university degree	yes	daily	0	usually	usually	usually	usually	sometimes	usually	never	always	always	never	usually	occasionally	sometimes	usually	never	usually	usually	occasionally	rarely	sometimes	never	occasionally	usually	rarely	sometimes	never	always	rarely	sometimes	sometimes	usually	always	never	sometimes	usually	usually	almost never/never	some of the time	some of the time	some of the time	most of the time	most of the time
250	(social) media	33	male	university degree	yes	several times per week	3	never	always	always	occasionally	always	always	occasionally	always	usually	sometimes	sometimes	usually	always	never	occasionally	sometimes	usually	always	occasionally	usually	never	usually	usually	never	sometimes	never	usually	occasionally	rarely	never	usually	sometimes	never	occasionally	never	always	some of the time	almost always/always	almost always/always	almost never/never	almost always/always	almost always/always
251	(social) media	52	male	university degree	yes	once in a month	0	always	always	always	always	always	always	always	always	always	always	always	always	always	always	never	usually	usually	always	always	always	never	always	always	always	always	always	always	always	always	always	always	always	usually	always	usually	always	almost never/never	almost never/never	almost never/never	almost never/never	almost always/always	almost always/always
252	(social) media	16	male	high school degree	yes	once a week	0	occasionally	sometimes	always	occasionally	never	rarely	usually	always	usually	usually	usually	sometimes	usually	usually	rarely	rarely	usually	always	sometimes	occasionally	rarely	occasionally	usually	rarely	usually	occasionally	usually	sometimes	sometimes	usually	usually	usually	sometimes	sometimes	occasionally	occasionally	some of the time	half of the time	some of the time	almost never/never	most of the time	half of the time
253	other	30	male	higher college degree	yes	several times per week	4	never	always	always	never	always	never	sometimes	always	always	always	always	always	always	sometimes	never	always	always	always	never	always	sometimes	always	always	always	always	always	always	sometimes	never	never	always	always	always	sometimes	sometimes	always	almost never/never	almost never/never	almost never/never	almost never/never	almost always/always	most of the time
254	other	18	male	high school degree	yes	several times per week	6	usually	never	always	sometimes	usually	rarely	occasionally	always	always	rarely	usually	always	always	never	rarely	usually	rarely	always	rarely	always	always	always	usually	sometimes	rarely	usually	always	usually	always	occasionally	usually	always	occasionally	occasionally	sometimes	usually	half of the time	half of the time	half of the time	half of the time	most of the time	almost always/always
255	letter	33	male	university degree	yes	once in a month	0	always	never	always	always	never	usually	usually	always	usually	always	never	never	usually	occasionally	usually	always	usually	always	usually	never	never	never	always	never	never	never	always	never	usually	never	occasionally	always	occasionally	never	sometimes	always	almost never/never	almost never/never	almost never/never	almost never/never	most of the time	most of the time
256	letter	21	male	apprenticeship	yes	once a week	0	always	usually	always	usually	occasionally	occasionally	usually	occasionally	always	always	sometimes	always	always	never	rarely	always	rarely	occasionally	never	sometimes	usually	rarely	usually	occasionally	usually	usually	usually	rarely	usually	usually	usually	usually	rarely	usually	sometimes	always	almost never/never	almost never/never	almost never/never	almost never/never	almost always/always	almost always/always
257	letter	31	male	university degree	yes	several times per week	2	never	always	always	usually	never	never	usually	always	sometimes	sometimes	always	never	always	occasionally	never	always	usually	always	never	usually	never	never	always	never	never	never	usually	sometimes	never	never	never	usually	sometimes	sometimes	sometimes	always	almost never/never	almost never/never	almost never/never	some of the time	most of the time	most of the time
258	(social) media	21	female	apprenticeship	yes	daily	0	usually	always	always	always	always	usually	rarely	always	always	rarely	always	always	always	never	usually	always	usually	4.34485	usually	always	2.7972	2.95085	always	rarely	usually	occasionally	3.06822	usually	occasionally	rarely	sometimes	4.30065	rarely	rarely	occasionally	usually	half of the time	half of the time	most of the time	half of the time	almost always/always	almost always/always
259	(social) media	45	male	apprenticeship	yes	once in a month	0	usually	usually	always	always	always	rarely	always	always	usually	always	always	always	always	never	usually	rarely	usually	usually	rarely	usually	never	rarely	usually	usually	always	occasionally	sometimes	sometimes	never	usually	usually	rarely	never	usually	never	usually	almost never/never	almost never/never	almost never/never	almost never/never	almost always/always	almost always/always
260	other	44	male	university degree	yes	several times per week	3	rarely	always	always	usually	always	always	usually	always	sometimes	usually	always	sometimes	always	occasionally	sometimes	always	sometimes	always	occasionally	sometimes	sometimes	never	always	rarely	usually	always	usually	usually	sometimes	sometimes	occasionally	usually	usually	rarely	usually	sometimes	almost never/never	almost never/never	almost never/never	almost never/never	most of the time	most of the time
261	other	25	female	apprenticeship	yes	once in a month	0	usually	rarely	always	sometimes	always	sometimes	never	always	always	sometimes	always	always	always	always	never	always	usually	never	sometimes	sometimes	never	sometimes	sometimes	never	sometimes	always	always	always	always	sometimes	sometimes	sometimes	always	sometimes	always	always	almost never/never	almost never/never	some of the time	almost never/never	half of the time	most of the time
262	letter	37	female	high school degree	yes	daily	0	never	never	occasionally	always	always	always	never	never	always	rarely	sometimes	always	sometimes	rarely	never	always	never	never	occasionally	never	never	never	sometimes	occasionally	always	always	sometimes	never	sometimes	never	never	never	never	never	occasionally	never	some of the time	almost always/always	almost always/always	almost never/never	almost always/always	half of the time
263	(social) media	53	male	high school degree	yes	several times per week	4	never	usually	never	never	always	always	never	always	always	never	never	never	never	never	never	always	never	always	never	always	never	never	never	always	never	always	always	never	never	always	never	never	always	always	always	never	almost never/never	almost never/never	almost never/never	almost never/never	most of the time	almost always/always
264	(social) media	27	male	apprenticeship	yes	once in a month	0	usually	always	always	usually	usually	sometimes	usually	always	usually	usually	always	rarely	always	rarely	sometimes	usually	usually	usually	usually	sometimes	usually	usually	usually	rarely	usually	occasionally	sometimes	usually	rarely	rarely	usually	occasionally	rarely	rarely	occasionally	usually	some of the time	some of the time	almost never/never	some of the time	most of the time	most of the time
265	letter	60	female	higher college degree	yes	once a week	0	rarely	always	always	usually	always	always	always	always	always	always	always	always	always	usually	always	always	always	always	always	sometimes	always	always	always	always	always	always	always	always	4.61135	always	always	always	always	always	always	always	almost never/never	almost never/never	almost never/never	almost never/never	some of the time	almost never/never
266	other	30	male	university degree	yes	once in a month	0	sometimes	usually	always	usually	usually	sometimes	sometimes	always	usually	always	always	never	always	usually	occasionally	always	rarely	always	rarely	usually	never	always	always	never	usually	usually	always	occasionally	rarely	usually	never	occasionally	usually	sometimes	usually	always	almost never/never	almost never/never	some of the time	almost never/never	most of the time	some of the time
267	(social) media	26	male	higher college degree	yes	several times per week	2	occasionally	always	always	usually	usually	occasionally	usually	never	always	usually	always	never	usually	never	occasionally	rarely	usually	always	sometimes	always	rarely	sometimes	usually	usually	always	always	always	usually	sometimes	always	occasionally	always	usually	occasionally	usually	usually	almost never/never	some of the time	almost never/never	almost never/never	almost always/always	most of the time
268	(social) media	19	male	high school degree	yes	once a week	0	usually	usually	usually	sometimes	occasionally	rarely	rarely	always	always	rarely	usually	usually	always	occasionally	never	usually	occasionally	always	occasionally	usually	never	sometimes	sometimes	sometimes	occasionally	usually	sometimes	occasionally	rarely	rarely	usually	always	rarely	occasionally	sometimes	usually	almost never/never	almost never/never	some of the time	almost never/never	almost always/always	half of the time
269	letter	39	female	university degree	yes	daily	0	usually	rarely	rarely	rarely	rarely	usually	never	never	usually	never	never	always	rarely	never	never	never	never	never	always	never	rarely	never	never	never	never	rarely	always	never	sometimes	never	never	never	never	never	rarely	never	almost always/always	almost always/always	some of the time	some of the time	almost always/always	almost always/always
270	(social) media	20	female	high school degree	yes	once in a month	0	usually	always	always	never	always	usually	sometimes	always	always	always	usually	always	always	usually	occasionally	always	sometimes	always	usually	usually	always	always	usually	sometimes	sometimes	usually	always	usually	occasionally	usually	occasionally	usually	sometimes	usually	sometimes	always	almost never/never	some of the time	some of the time	some of the time	almost always/always	almost always/always
271	other	29	male	university degree	yes	daily	0	always	never	always	rarely	usually	never	never	never	always	never	sometimes	never	never	never	always	always	sometimes	usually	always	sometimes	never	occasionally	always	never	never	occasionally	never	never	never	never	never	usually	usually	occasionally	sometimes	rarely	some of the time	some of the time	some of the time	almost never/never	almost always/always	most of the time
272	(social) media	32	male	university degree	yes	several times per week	6	usually	usually	always	usually	rarely	occasionally	occasionally	usually	usually	occasionally	always	rarely	usually	rarely	never	always	sometimes	always	sometimes	rarely	never	sometimes	usually	never	sometimes	usually	always	rarely	sometimes	rarely	occasionally	usually	rarely	occasionally	rarely	never	half of the time	most of the time	some of the time	some of the time	almost always/always	almost always/always
273	other	24	male	university degree	yes	once in a month	0	usually	usually	always	sometimes	always	always	usually	always	always	always	usually	usually	always	usually	sometimes	always	rarely	always	sometimes	always	always	always	always	sometimes	usually	always	always	sometimes	sometimes	always	usually	always	always	usually	usually	always	almost never/never	some of the time	some of the time	almost never/never	most of the time	almost never/never
274	(social) media	41	male	apprenticeship	yes	daily	0	usually	always	usually	always	usually	sometimes	rarely	always	sometimes	never	always	sometimes	always	rarely	rarely	always	usually	usually	usually	never	occasionally	sometimes	usually	sometimes	sometimes	usually	usually	usually	sometimes	usually	usually	rarely	usually	rarely	occasionally	always	some of the time	half of the time	half of the time	some of the time	most of the time	most of the time
275	(social) media	53	male	university degree	yes	several times per week	2	always	usually	always	sometimes	always	usually	usually	always	always	usually	always	always	always	sometimes	usually	always	usually	always	sometimes	usually	never	never	always	usually	usually	usually	usually	usually	sometimes	sometimes	occasionally	usually	sometimes	occasionally	sometimes	always	half of the time	most of the time	half of the time	most of the time	almost always/always	most of the time
276	letter	50	male	university degree	yes	several times per week	2	occasionally	usually	always	usually	usually	usually	usually	always	usually	usually	usually	rarely	always	usually	sometimes	usually	sometimes	usually	usually	sometimes	usually	usually	usually	sometimes	sometimes	occasionally	rarely	occasionally	usually	usually	sometimes	sometimes	sometimes	occasionally	occasionally	sometimes	some of the time	some of the time	half of the time	some of the time	most of the time	some of the time
277	(social) media	23	female	apprenticeship	yes	once in a month	0	usually	usually	always	always	usually	usually	sometimes	always	always	always	always	always	always	sometimes	always	always	sometimes	always	sometimes	always	usually	usually	usually	usually	always	usually	always	always	usually	usually	rarely	usually	usually	always	usually	usually	almost never/never	almost never/never	almost never/never	almost never/never	most of the time	some of the time
278	(social) media	40	male	higher college degree	yes	daily	0	always	sometimes	usually	occasionally	occasionally	sometimes	never	usually	usually	never	rarely	usually	sometimes	sometimes	never	always	rarely	occasionally	sometimes	rarely	occasionally	occasionally	rarely	occasionally	never	always	usually	never	rarely	rarely	sometimes	rarely	usually	rarely	usually	usually	most of the time	most of the time	some of the time	most of the time	most of the time	most of the time
279	letter	30	male	university degree	yes	once in a month	0	usually	always	always	usually	usually	always	sometimes	always	always	always	always	always	always	usually	usually	always	usually	usually	usually	always	always	usually	usually	rarely	occasionally	occasionally	sometimes	usually	usually	sometimes	sometimes	usually	sometimes	usually	occasionally	always	some of the time	some of the time	almost never/never	almost never/never	almost always/always	most of the time
280	letter	26	female	apprenticeship	yes	once in a month	0	usually	sometimes	always	rarely	usually	rarely	usually	always	always	always	always	always	always	always	occasionally	always	occasionally	always	usually	always	always	never	always	always	always	always	always	sometimes	usually	sometimes	rarely	always	never	sometimes	always	sometimes	some of the time	some of the time	almost never/never	some of the time	almost always/always	almost always/always
281	letter	39	female	university degree	yes	daily	0	usually	usually	always	never	usually	usually	never	always	usually	never	usually	usually	always	rarely	rarely	never	usually	always	sometimes	occasionally	rarely	always	always	occasionally	never	never	rarely	always	rarely	always	rarely	occasionally	occasionally	rarely	occasionally	always	half of the time	almost never/never	almost never/never	half of the time	most of the time	almost never/never
282	(social) media	34	male	university degree	yes	several times per week	2	rarely	usually	never	usually	always	usually	usually	always	always	usually	usually	always	always	usually	3.27269	usually	usually	always	usually	usually	usually	usually	always	sometimes	sometimes	always	always	sometimes	usually	sometimes	always	always	usually	occasionally	usually	usually	almost never/never	some of the time	some of the time	almost never/never	most of the time	most of the time
283	(social) media	43	male	university degree	yes	several times per week	5	sometimes	occasionally	always	always	always	always	sometimes	always	usually	sometimes	always	always	always	occasionally	occasionally	always	always	always	sometimes	always	occasionally	rarely	always	always	sometimes	always	always	always	usually	usually	sometimes	always	always	occasionally	usually	always	some of the time	some of the time	some of the time	almost never/never	most of the time	some of the time
284	(social) media	24	female	apprenticeship	yes	once in a month	0	sometimes	always	always	usually	always	sometimes	always	always	usually	always	usually	usually	always	sometimes	rarely	sometimes	sometimes	usually	usually	usually	rarely	rarely	usually	sometimes	always	usually	always	sometimes	usually	sometimes	usually	sometimes	usually	always	usually	always	almost never/never	almost never/never	almost never/never	almost never/never	almost always/always	most of the time
285	(social) media	54	male	apprenticeship	yes	several times per week	5	never	never	never	rarely	never	occasionally	occasionally	rarely	never	sometimes	never	always	never	never	never	never	rarely	never	always	rarely	never	never	never	never	rarely	rarely	never	always	usually	always	never	never	rarely	never	usually	never	almost never/never	almost never/never	almost never/never	almost never/never	almost never/never	almost never/never
286	(social) media	21	male	high school degree	yes	once a week	0	always	always	always	always	always	usually	usually	always	always	usually	always	always	always	usually	rarely	always	always	4.74186	usually	usually	sometimes	4.86033	always	always	usually	always	always	never	always	rarely	always	5.4774	rarely	never	occasionally	always	almost never/never	almost never/never	almost never/never	almost never/never	almost always/always	almost always/always
287	other	40	male	university degree	yes	several times per week	5	sometimes	usually	always	usually	sometimes	sometimes	sometimes	always	usually	occasionally	always	never	always	rarely	usually	always	usually	always	occasionally	sometimes	sometimes	usually	always	never	sometimes	usually	sometimes	always	occasionally	sometimes	occasionally	usually	usually	rarely	usually	always	almost never/never	almost never/never	almost never/never	almost never/never	almost always/always	some of the time
288	(social) media	22	male	higher college degree	yes	daily	0	usually	occasionally	usually	always	always	always	rarely	always	always	rarely	sometimes	always	occasionally	usually	never	always	sometimes	always	usually	always	sometimes	always	occasionally	usually	sometimes	always	usually	rarely	usually	usually	usually	always	sometimes	usually	usually	always	some of the time	some of the time	almost never/never	almost never/never	most of the time	some of the time
289	letter	31	female	university degree	yes	once in a month	0	always	always	always	sometimes	always	usually	always	always	always	always	sometimes	always	always	sometimes	usually	always	sometimes	always	rarely	always	sometimes	rarely	sometimes	never	occasionally	always	usually	rarely	rarely	rarely	never	always	occasionally	usually	sometimes	always	almost never/never	almost never/never	almost never/never	almost never/never	almost always/always	most of the time
290	letter	26	male	apprenticeship	yes	several times per week	3	usually	usually	always	sometimes	sometimes	sometimes	sometimes	always	usually	sometimes	occasionally	rarely	usually	sometimes	never	usually	occasionally	always	usually	usually	sometimes	rarely	occasionally	never	never	sometimes	usually	occasionally	usually	sometimes	sometimes	occasionally	never	rarely	occasionally	sometimes	some of the time	most of the time	half of the time	some of the time	almost always/always	most of the time
291	(social) media	23	female	university degree	yes	once in a month	0	usually	usually	usually	usually	always	usually	rarely	always	sometimes	usually	sometimes	rarely	sometimes	sometimes	occasionally	rarely	rarely	usually	sometimes	usually	occasionally	rarely	occasionally	never	rarely	occasionally	sometimes	occasionally	occasionally	rarely	never	sometimes	never	rarely	rarely	sometimes	some of the time	almost never/never	almost never/never	some of the time	most of the time	most of the time
292	(social) media	50	female	higher college degree	yes	several times per week	2	sometimes	usually	always	always	usually	sometimes	usually	usually	always	usually	usually	never	always	always	usually	rarely	occasionally	usually	always	sometimes	never	usually	usually	rarely	usually	usually	usually	rarely	sometimes	usually	usually	always	always	sometimes	usually	always	almost never/never	almost never/never	almost never/never	almost never/never	almost always/always	most of the time
293	letter	49	male	university degree	yes	several times per week	4	never	always	always	always	always	always	never	always	usually	never	usually	never	always	usually	always	always	usually	usually	never	occasionally	never	never	usually	never	never	never	always	never	usually	occasionally	never	rarely	occasionally	never	usually	usually	almost never/never	almost never/never	almost never/never	almost never/never	almost always/always	almost always/always
294	(social) media	20	male	apprenticeship	yes	daily	0	sometimes	usually	occasionally	sometimes	rarely	sometimes	rarely	usually	always	usually	occasionally	usually	always	occasionally	never	always	rarely	usually	never	usually	always	sometimes	usually	usually	occasionally	sometimes	sometimes	usually	rarely	never	always	usually	never	never	never	occasionally	some of the time	some of the time	some of the time	half of the time	almost always/always	almost always/always
295	(social) media	23	male	apprenticeship	yes	daily	0	occasionally	rarely	always	sometimes	always	occasionally	never	always	never	never	always	never	never	sometimes	never	always	always	never	usually	rarely	never	rarely	always	never	never	rarely	sometimes	rarely	rarely	occasionally	sometimes	occasionally	always	occasionally	usually	always	almost never/never	half of the time	some of the time	almost always/always	almost always/always	most of the time
296	letter	25	female	university degree	yes	several times per week	3	sometimes	always	always	occasionally	always	sometimes	occasionally	always	usually	occasionally	usually	always	always	usually	rarely	usually	occasionally	sometimes	occasionally	sometimes	usually	sometimes	usually	usually	rarely	usually	always	occasionally	occasionally	sometimes	occasionally	usually	never	sometimes	usually	sometimes	some of the time	almost never/never	most of the time	some of the time	most of the time	most of the time
297	other	34	male	apprenticeship	yes	daily	0	usually	rarely	sometimes	never	usually	usually	never	usually	always	never	rarely	always	usually	never	2.15012	always	never	always	usually	occasionally	1.86949	always	rarely	never	always	usually	usually	rarely	rarely	never	never	never	never	rarely	occasionally	usually	almost never/never	half of the time	almost never/never	almost never/never	almost always/always	almost always/always
298	other	33	male	apprenticeship	yes	daily	0	always	never	never	always	never	never	never	always	usually	never	never	never	never	never	never	never	never	never	usually	never	never	never	never	usually	never	rarely	usually	never	never	rarely	never	never	rarely	never	rarely	always	half of the time	most of the time	some of the time	some of the time	most of the time	almost always/always
299	(social) media	21	male	apprenticeship	yes	once a week	0	usually	never	rarely	never	occasionally	rarely	always	always	usually	always	usually	rarely	always	rarely	occasionally	always	usually	usually	occasionally	usually	rarely	rarely	usually	never	occasionally	occasionally	usually	rarely	usually	rarely	never	usually	rarely	rarely	rarely	usually	almost never/never	almost never/never	almost never/never	almost never/never	almost always/always	most of the time
300	letter	30	male	higher college degree	yes	daily	0	rarely	never	never	usually	sometimes	rarely	never	usually	always	never	rarely	rarely	rarely	never	never	sometimes	occasionally	never	rarely	never	never	never	rarely	never	rarely	occasionally	never	never	never	rarely	sometimes	never	rarely	never	never	occasionally	most of the time	most of the time	most of the time	almost always/always	almost never/never	almost always/always
301	letter	66	female	higher college degree	yes	several times per week	4	usually	always	always	occasionally	always	always	sometimes	always	always	usually	always	always	always	always	occasionally	always	usually	sometimes	always	always	usually	always	always	always	always	always	always	usually	always	usually	never	always	always	occasionally	usually	always	some of the time	some of the time	some of the time	some of the time	most of the time	some of the time
302	(social) media	18	male	high school degree	yes	daily	0	usually	always	usually	rarely	never	sometimes	never	never	usually	rarely	occasionally	usually	always	never	never	occasionally	occasionally	usually	never	rarely	sometimes	never	occasionally	rarely	never	never	occasionally	usually	rarely	never	occasionally	never	never	rarely	rarely	never	most of the time	most of the time	almost always/always	almost always/always	almost always/always	most of the time
303	(social) media	24	male	university degree	yes	daily	0	usually	rarely	usually	occasionally	rarely	rarely	never	rarely	occasionally	rarely	usually	sometimes	always	rarely	rarely	never	occasionally	rarely	rarely	rarely	sometimes	rarely	sometimes	rarely	rarely	usually	sometimes	rarely	sometimes	rarely	rarely	occasionally	usually	rarely	occasionally	rarely	some of the time	some of the time	some of the time	almost never/never	almost always/always	almost always/always
304	(social) media	28	male	apprenticeship	yes	daily	0	usually	occasionally	usually	occasionally	rarely	usually	rarely	always	always	rarely	usually	usually	always	sometimes	usually	always	occasionally	always	rarely	sometimes	never	rarely	usually	rarely	occasionally	usually	usually	rarely	rarely	rarely	sometimes	sometimes	usually	rarely	usually	occasionally	some of the time	almost never/never	some of the time	some of the time	almost always/always	most of the time
305	(social) media	28	female	university degree	yes	once in a month	0	usually	always	always	always	sometimes	usually	always	always	rarely	always	always	always	always	always	usually	usually	usually	always	occasionally	always	always	always	always	rarely	always	usually	always	occasionally	rarely	sometimes	rarely	always	usually	always	usually	always	almost never/never	almost never/never	almost never/never	almost never/never	almost always/always	some of the time
306	(social) media	24	male	university degree	yes	once in a month	0	usually	usually	always	always	usually	rarely	usually	always	always	always	always	usually	always	sometimes	rarely	always	sometimes	always	occasionally	always	sometimes	rarely	always	rarely	usually	usually	usually	usually	usually	sometimes	usually	usually	always	always	occasionally	occasionally	almost never/never	almost never/never	some of the time	almost never/never	most of the time	some of the time
307	letter	19	male	high school degree	yes	several times per week	4	occasionally	sometimes	always	occasionally	occasionally	usually	usually	always	always	occasionally	usually	always	always	sometimes	usually	always	occasionally	usually	sometimes	sometimes	sometimes	usually	usually	rarely	occasionally	usually	sometimes	rarely	sometimes	occasionally	sometimes	sometimes	usually	occasionally	occasionally	occasionally	half of the time	some of the time	some of the time	some of the time	some of the time	some of the time
308	other	27	male	apprenticeship	yes	daily	0	usually	always	always	rarely	rarely	usually	never	always	usually	never	always	always	always	never	never	always	usually	always	usually	occasionally	never	always	always	never	never	always	always	usually	sometimes	usually	always	never	always	never	never	sometimes	most of the time	most of the time	some of the time	half of the time	almost always/always	most of the time
309	letter	18	male	apprenticeship	yes	once in a month	0	always	usually	always	always	always	rarely	never	always	always	always	sometimes	occasionally	always	never	rarely	always	never	always	never	always	never	rarely	always	rarely	always	always	always	rarely	never	never	rarely	always	always	always	usually	always	almost never/never	almost never/never	almost never/never	some of the time	almost always/always	almost always/always
310	letter	44	male	university degree	yes	once a week	0	usually	occasionally	always	usually	always	usually	always	always	usually	always	always	rarely	always	always	usually	never	usually	always	usually	always	sometimes	always	always	always	always	always	always	usually	usually	usually	usually	usually	always	always	always	sometimes	almost never/never	almost never/never	almost never/never	almost never/never	almost always/always	some of the time
311	letter	39	male	apprenticeship	yes	daily	0	always	usually	always	usually	usually	usually	never	always	always	rarely	occasionally	sometimes	always	usually	rarely	rarely	sometimes	always	usually	rarely	rarely	usually	usually	sometimes	sometimes	usually	usually	sometimes	sometimes	sometimes	sometimes	usually	sometimes	rarely	sometimes	usually	half of the time	some of the time	half of the time	half of the time	most of the time	almost always/always
312	other	40	male	apprenticeship	yes	daily	0	always	usually	always	always	always	occasionally	always	always	always	occasionally	rarely	always	always	sometimes	never	never	occasionally	always	occasionally	occasionally	occasionally	never	occasionally	never	always	usually	always	occasionally	rarely	occasionally	usually	always	always	rarely	occasionally	always	some of the time	almost never/never	almost never/never	some of the time	half of the time	almost always/always
313	other	24	female	apprenticeship	yes	once in a month	0	always	always	always	usually	usually	always	sometimes	always	always	always	always	always	always	always	always	always	never	always	usually	always	always	always	always	usually	always	always	always	always	always	5.0492	never	usually	usually	always	always	always	almost never/never	some of the time	almost never/never	almost never/never	half of the time	some of the time
314	(social) media	50	male	university degree	yes	once a week	0	usually	sometimes	usually	occasionally	usually	usually	occasionally	usually	usually	occasionally	occasionally	sometimes	usually	sometimes	rarely	usually	rarely	usually	sometimes	usually	rarely	sometimes	usually	usually	sometimes	usually	usually	sometimes	occasionally	sometimes	rarely	occasionally	occasionally	sometimes	sometimes	usually	some of the time	almost never/never	most of the time	some of the time	almost always/always	most of the time
315	(social) media	53	male	university degree	yes	once a week	0	always	always	always	always	always	always	always	always	always	always	always	always	always	never	always	always	usually	always	always	never	never	sometimes	always	always	usually	sometimes	always	always	always	usually	always	usually	always	never	always	always	almost never/never	almost never/never	almost never/never	almost never/never	almost always/always	most of the time
316	(social) media	19	male	apprenticeship	yes	once in a month	0	always	always	always	always	usually	occasionally	always	always	always	always	never	rarely	occasionally	always	always	always	occasionally	always	occasionally	usually	never	usually	usually	always	always	occasionally	usually	occasionally	rarely	sometimes	usually	always	always	always	occasionally	always	almost never/never	almost never/never	most of the time	almost never/never	most of the time	almost always/always
317	letter	15	male	high school degree	yes	several times per week	4	usually	sometimes	sometimes	usually	always	occasionally	rarely	always	usually	rarely	sometimes	sometimes	always	sometimes	rarely	never	rarely	always	rarely	occasionally	rarely	occasionally	sometimes	rarely	never	occasionally	usually	rarely	occasionally	rarely	sometimes	usually	rarely	rarely	usually	rarely	almost never/never	almost never/never	almost never/never	almost never/never	most of the time	almost always/always
318	letter	50	male	university degree	yes	daily	0	always	usually	always	usually	always	always	never	rarely	never	rarely	usually	never	always	always	never	always	usually	always	usually	always	never	always	usually	never	always	always	always	usually	usually	usually	usually	usually	usually	sometimes	usually	usually	almost never/never	almost never/never	almost never/never	almost never/never	almost always/always	almost always/always
319	(social) media	30	female	apprenticeship	yes	daily	0	always	usually	always	occasionally	sometimes	rarely	occasionally	never	always	rarely	always	always	always	never	sometimes	never	always	always	occasionally	always	sometimes	always	always	sometimes	occasionally	always	always	never	usually	usually	never	never	never	sometimes	usually	occasionally	almost never/never	almost always/always	almost never/never	almost never/never	almost always/always	almost always/always
320	letter	36	male	university degree	yes	once in a month	0	usually	usually	always	always	rarely	usually	usually	4.46153	always	always	always	rarely	always	usually	occasionally	always	occasionally	5.11152	sometimes	usually	usually	4.54229	usually	occasionally	always	usually	sometimes	usually	usually	sometimes	rarely	always	usually	never	usually	usually	almost never/never	almost never/never	almost never/never	almost never/never	almost always/always	some of the time
321	(social) media	37	male	university degree	yes	several times per week	3	occasionally	always	always	always	usually	rarely	usually	usually	always	usually	usually	usually	always	always	always	always	rarely	always	sometimes	always	always	always	always	usually	always	usually	always	usually	usually	usually	usually	always	always	always	usually	usually	almost never/never	almost never/never	almost never/never	almost never/never	most of the time	most of the time
322	other	26	male	university degree	yes	once a week	0	usually	always	always	sometimes	usually	sometimes	occasionally	always	usually	usually	always	usually	always	rarely	rarely	always	occasionally	usually	usually	sometimes	rarely	rarely	always	never	rarely	occasionally	always	rarely	occasionally	rarely	rarely	sometimes	occasionally	occasionally	rarely	always	almost never/never	some of the time	some of the time	some of the time	almost always/always	most of the time
323	(social) media	38	male	university degree	yes	several times per week	5	sometimes	usually	always	sometimes	always	sometimes	occasionally	usually	usually	usually	always	usually	always	occasionally	usually	always	usually	usually	occasionally	rarely	sometimes	always	usually	occasionally	sometimes	always	usually	sometimes	usually	sometimes	occasionally	sometimes	always	occasionally	sometimes	usually	some of the time	almost never/never	almost never/never	some of the time	most of the time	almost always/always
324	letter	25	female	higher college degree	yes	once in a month	0	sometimes	usually	always	usually	always	sometimes	usually	always	always	always	always	never	always	sometimes	sometimes	sometimes	usually	always	sometimes	never	never	never	always	usually	always	usually	always	usually	occasionally	sometimes	usually	usually	sometimes	sometimes	usually	usually	almost never/never	almost never/never	almost never/never	almost never/never	most of the time	some of the time
325	(social) media	23	male	apprenticeship	yes	daily	0	usually	sometimes	usually	rarely	occasionally	sometimes	never	always	usually	occasionally	usually	usually	always	rarely	never	usually	occasionally	occasionally	occasionally	sometimes	usually	sometimes	usually	rarely	occasionally	usually	always	usually	sometimes	sometimes	usually	occasionally	rarely	sometimes	occasionally	occasionally	half of the time	most of the time	some of the time	almost never/never	almost always/always	most of the time
326	letter	40	female	apprenticeship	yes	daily	0	occasionally	usually	occasionally	rarely	always	rarely	rarely	always	always	rarely	sometimes	never	always	always	always	sometimes	never	always	rarely	sometimes	always	usually	occasionally	usually	rarely	occasionally	always	sometimes	usually	occasionally	never	usually	always	occasionally	usually	sometimes	half of the time	most of the time	most of the time	some of the time	most of the time	most of the time
327	letter	27	male	higher college degree	yes	daily	0	always	usually	always	never	usually	sometimes	never	usually	sometimes	never	never	usually	always	never	never	always	never	rarely	sometimes	never	never	sometimes	occasionally	never	never	sometimes	usually	never	usually	4.87618	usually	never	usually	rarely	usually	usually	most of the time	almost always/always	half of the time	almost always/always	almost always/always	almost always/always
328	letter	57	female	higher college degree	yes	daily	0	usually	always	always	occasionally	usually	usually	sometimes	usually	always	rarely	usually	sometimes	always	occasionally	rarely	always	usually	always	usually	sometimes	occasionally	4.63367	always	never	rarely	rarely	rarely	sometimes	sometimes	rarely	sometimes	rarely	rarely	occasionally	usually	usually	some of the time	some of the time	almost never/never	almost never/never	most of the time	some of the time
329	letter	33	female	university degree	yes	once in a month	0	always	always	always	always	always	always	usually	always	always	always	always	always	always	always	always	always	sometimes	always	rarely	always	always	always	always	never	always	always	always	usually	always	always	always	always	always	always	always	always	almost never/never	almost never/never	almost never/never	almost never/never	half of the time	almost never/never
330	(social) media	39	male	apprenticeship	yes	once a week	0	always	always	always	always	rarely	always	rarely	usually	usually	always	always	never	always	never	always	always	usually	rarely	rarely	rarely	rarely	rarely	usually	occasionally	usually	usually	usually	rarely	rarely	rarely	never	rarely	always	usually	occasionally	always	almost never/never	almost never/never	almost never/never	some of the time	most of the time	most of the time
331	(social) media	21	female	high school degree	yes	once in a month	0	never	never	never	always	always	sometimes	never	always	always	never	never	occasionally	never	always	never	always	never	always	never	never	never	never	never	always	always	always	always	never	never	never	never	never	never	never	never	never	almost never/never	almost never/never	almost never/never	almost never/never	almost never/never	almost never/never
332	letter	50	male	apprenticeship	yes	daily	0	usually	usually	always	always	always	always	sometimes	always	always	sometimes	always	always	always	always	always	always	always	always	always	sometimes	always	always	always	always	usually	always	always	always	always	always	always	always	always	sometimes	always	always	almost never/never	almost never/never	almost never/never	almost never/never	most of the time	most of the time
333	other	34	male	apprenticeship	yes	several times per week	5	usually	always	always	usually	rarely	occasionally	rarely	usually	always	sometimes	sometimes	rarely	always	usually	never	occasionally	never	rarely	sometimes	usually	rarely	always	usually	rarely	usually	usually	usually	rarely	occasionally	rarely	sometimes	always	rarely	occasionally	occasionally	usually	half of the time	most of the time	half of the time	some of the time	almost always/always	almost always/always
334	letter	46	female	apprenticeship	yes	daily	0	occasionally	usually	always	never	never	sometimes	never	never	always	rarely	always	sometimes	always	always	never	never	always	always	occasionally	usually	never	never	always	rarely	rarely	sometimes	usually	rarely	usually	rarely	sometimes	always	never	occasionally	rarely	always	most of the time	half of the time	some of the time	most of the time	most of the time	most of the time
335	other	21	male	higher college degree	yes	several times per week	5	always	usually	usually	usually	usually	sometimes	rarely	usually	always	occasionally	usually	rarely	always	never	never	always	occasionally	always	usually	sometimes	sometimes	occasionally	usually	occasionally	occasionally	rarely	sometimes	occasionally	sometimes	sometimes	sometimes	usually	sometimes	sometimes	rarely	always	almost never/never	almost never/never	almost never/never	almost never/never	almost always/always	most of the time
336	(social) media	25	male	higher college degree	yes	daily	0	occasionally	usually	usually	rarely	always	usually	always	always	always	never	never	occasionally	rarely	usually	never	never	never	never	never	sometimes	never	never	never	never	never	always	always	rarely	never	usually	never	never	always	usually	usually	never	some of the time	almost never/never	almost never/never	almost never/never	most of the time	most of the time
337	other	35	male	university degree	yes	several times per week	4	usually	usually	always	sometimes	never	sometimes	sometimes	never	always	usually	always	always	always	never	rarely	never	usually	usually	rarely	sometimes	rarely	always	usually	never	usually	always	sometimes	usually	rarely	sometimes	usually	usually	usually	sometimes	usually	always	almost never/never	almost never/never	some of the time	almost never/never	most of the time	almost never/never
338	(social) media	24	male	higher college degree	yes	once a week	0	sometimes	usually	always	usually	rarely	occasionally	rarely	rarely	usually	sometimes	usually	never	usually	rarely	rarely	never	sometimes	usually	occasionally	usually	usually	usually	usually	never	sometimes	usually	sometimes	sometimes	sometimes	occasionally	rarely	never	never	sometimes	sometimes	usually	some of the time	almost never/never	some of the time	almost never/never	most of the time	most of the time
339	other	29	male	high school degree	yes	daily	0	sometimes	occasionally	usually	rarely	always	always	rarely	always	usually	never	occasionally	occasionally	sometimes	usually	rarely	always	sometimes	occasionally	usually	rarely	usually	always	usually	sometimes	rarely	always	always	rarely	always	always	occasionally	sometimes	sometimes	rarely	occasionally	rarely	almost never/never	most of the time	most of the time	almost never/never	half of the time	half of the time
340	letter	32	male	apprenticeship	yes	daily	0	usually	usually	never	rarely	never	rarely	never	always	rarely	never	rarely	always	rarely	never	never	usually	never	never	occasionally	occasionally	never	rarely	occasionally	never	rarely	occasionally	usually	occasionally	rarely	rarely	always	always	never	rarely	rarely	rarely	some of the time	half of the time	some of the time	some of the time	most of the time	some of the time
341	(social) media	21	female	high school degree	yes	once a week	0	usually	always	always	sometimes	always	usually	occasionally	always	always	sometimes	always	usually	always	rarely	never	never	sometimes	usually	usually	sometimes	rarely	always	usually	occasionally	occasionally	rarely	always	occasionally	always	rarely	always	sometimes	never	always	rarely	always	some of the time	some of the time	some of the time	some of the time	almost always/always	almost always/always
342	(social) media	34	male	university degree	yes	once in a month	0	usually	usually	always	always	always	usually	occasionally	always	rarely	always	usually	always	always	never	never	always	occasionally	sometimes	occasionally	always	occasionally	never	usually	never	usually	always	always	rarely	occasionally	rarely	never	never	never	sometimes	sometimes	occasionally	almost never/never	almost never/never	almost never/never	almost never/never	almost always/always	almost always/always
343	(social) media	40	male	apprenticeship	yes	daily	0	never	usually	always	rarely	rarely	rarely	never	sometimes	always	never	sometimes	never	usually	never	never	never	rarely	rarely	rarely	rarely	never	never	sometimes	never	rarely	never	sometimes	occasionally	rarely	rarely	never	rarely	never	rarely	rarely	usually	most of the time	most of the time	almost never/never	most of the time	almost always/always	most of the time
344	letter	55	female	university degree	yes	once a week	0	always	sometimes	always	always	always	always	always	sometimes	always	always	always	never	always	usually	always	always	sometimes	always	rarely	always	never	always	usually	always	always	always	always	sometimes	sometimes	sometimes	sometimes	always	always	always	sometimes	always	almost never/never	almost never/never	almost never/never	almost never/never	almost always/always	most of the time
345	(social) media	27	male	apprenticeship	yes	daily	0	never	never	sometimes	occasionally	usually	occasionally	sometimes	always	always	never	always	never	never	never	always	never	never	never	usually	occasionally	never	usually	never	usually	usually	usually	usually	never	sometimes	never	always	occasionally	never	occasionally	sometimes	sometimes	some of the time	almost always/always	some of the time	almost never/never	almost always/always	almost always/always
346	letter	33	female	higher college degree	yes	several times per week	5	usually	always	always	always	always	usually	rarely	always	usually	rarely	usually	always	always	usually	never	always	usually	always	occasionally	sometimes	rarely	always	always	usually	rarely	always	usually	usually	usually	usually	never	always	always	never	usually	always	almost never/never	almost never/never	some of the time	almost never/never	almost always/always	almost always/always
347	letter	62	male	university degree	yes	once in a month	0	always	always	always	always	occasionally	always	rarely	always	usually	usually	usually	rarely	always	rarely	rarely	always	rarely	usually	occasionally	usually	rarely	always	always	occasionally	sometimes	4.21971	usually	occasionally	usually	rarely	usually	always	usually	usually	never	rarely	almost never/never	some of the time	almost never/never	almost never/never	almost always/always	almost always/always
348	(social) media	55	male	apprenticeship	yes	daily	0	never	always	usually	rarely	always	usually	never	usually	always	never	usually	rarely	always	always	never	always	rarely	never	always	never	never	never	usually	never	usually	usually	always	never	always	never	never	never	always	never	usually	never	some of the time	some of the time	some of the time	half of the time	almost always/always	most of the time
349	letter	37	male	apprenticeship	yes	once a week	0	occasionally	usually	always	always	always	rarely	always	always	usually	usually	always	never	always	never	occasionally	never	sometimes	always	sometimes	always	sometimes	always	always	never	never	sometimes	always	sometimes	sometimes	sometimes	always	always	sometimes	sometimes	usually	always	almost never/never	almost never/never	almost never/never	almost never/never	almost never/never	half of the time
350	other	29	male	higher college degree	yes	once in a month	0	usually	always	usually	occasionally	rarely	never	occasionally	always	usually	always	usually	rarely	always	rarely	never	rarely	never	sometimes	sometimes	rarely	rarely	usually	sometimes	rarely	never	occasionally	never	never	occasionally	never	rarely	rarely	never	occasionally	occasionally	occasionally	almost never/never	most of the time	almost never/never	almost never/never	almost always/always	almost always/always
351	(social) media	25	male	higher college degree	yes	several times per week	5	usually	usually	always	always	always	sometimes	always	always	always	rarely	always	occasionally	always	occasionally	never	never	sometimes	always	occasionally	always	occasionally	occasionally	occasionally	always	never	occasionally	usually	usually	usually	sometimes	sometimes	usually	never	occasionally	sometimes	always	almost never/never	almost never/never	almost never/never	almost never/never	almost always/always	almost always/always
352	letter	30	female	university degree	yes	daily	0	usually	always	always	always	usually	sometimes	sometimes	always	usually	never	never	occasionally	always	sometimes	never	usually	occasionally	always	never	rarely	sometimes	usually	always	rarely	rarely	usually	sometimes	sometimes	sometimes	usually	rarely	occasionally	sometimes	rarely	sometimes	always	almost never/never	almost never/never	almost never/never	some of the time	almost always/always	almost always/always
353	letter	30	female	apprenticeship	yes	daily	0	always	usually	always	occasionally	always	always	never	always	always	rarely	always	always	always	occasionally	rarely	always	sometimes	always	usually	sometimes	sometimes	occasionally	always	usually	rarely	usually	always	never	occasionally	usually	always	rarely	usually	sometimes	sometimes	always	half of the time	almost always/always	some of the time	most of the time	almost always/always	almost always/always
354	(social) media	23	male	university degree	yes	several times per week	5	always	usually	always	usually	sometimes	usually	rarely	always	always	rarely	always	always	always	usually	never	always	sometimes	always	usually	usually	rarely	usually	always	usually	occasionally	always	always	rarely	sometimes	always	usually	always	always	rarely	always	usually	almost never/never	almost never/never	almost never/never	almost never/never	most of the time	most of the time
355	(social) media	25	female	university degree	yes	daily	0	usually	occasionally	always	rarely	usually	sometimes	rarely	always	always	never	usually	usually	always	usually	rarely	usually	usually	usually	usually	rarely	rarely	sometimes	usually	usually	sometimes	usually	usually	sometimes	rarely	rarely	usually	occasionally	occasionally	rarely	rarely	never	almost never/never	almost never/never	almost never/never	almost never/never	almost always/always	most of the time
356	(social) media	25	female	university degree	yes	several times per week	5	usually	always	always	occasionally	usually	always	occasionally	always	always	occasionally	always	always	always	always	sometimes	always	always	always	usually	sometimes	sometimes	sometimes	always	rarely	occasionally	always	usually	always	always	always	rarely	occasionally	usually	usually	sometimes	always	some of the time	half of the time	some of the time	some of the time	most of the time	almost always/always
357	other	20	male	high school degree	yes	once a week	0	always	usually	usually	always	always	rarely	occasionally	always	always	always	always	sometimes	always	occasionally	occasionally	sometimes	sometimes	never	never	sometimes	sometimes	sometimes	usually	rarely	usually	rarely	rarely	never	occasionally	never	never	always	usually	sometimes	never	occasionally	almost never/never	almost never/never	almost never/never	almost never/never	almost always/always	almost always/always
358	other	34	male	university degree	yes	once in a month	0	always	always	always	usually	always	rarely	usually	always	usually	always	always	occasionally	always	usually	rarely	occasionally	usually	usually	never	usually	sometimes	2.83189	always	sometimes	sometimes	usually	usually	4.21135	sometimes	sometimes	rarely	usually	rarely	occasionally	rarely	always	some of the time	almost never/never	almost never/never	some of the time	most of the time	most of the time
359	letter	29	male	university degree	yes	once in a month	0	usually	sometimes	always	usually	always	usually	rarely	always	usually	always	always	never	always	usually	rarely	never	usually	always	usually	always	usually	never	usually	rarely	rarely	usually	usually	usually	usually	rarely	usually	always	usually	usually	rarely	usually	half of the time	almost never/never	almost never/never	half of the time	almost always/always	almost always/always
360	other	33	male	university degree	yes	several times per week	3	always	occasionally	usually	rarely	sometimes	occasionally	sometimes	always	always	usually	always	never	always	sometimes	never	always	usually	always	rarely	sometimes	never	always	usually	never	sometimes	sometimes	usually	occasionally	rarely	sometimes	usually	always	always	sometimes	sometimes	occasionally	some of the time	some of the time	some of the time	almost never/never	most of the time	almost always/always
361	(social) media	41	male	higher college degree	yes	once in a month	0	always	always	always	always	always	sometimes	never	always	always	always	always	always	always	sometimes	usually	always	sometimes	occasionally	never	never	never	never	always	never	never	always	never	never	sometimes	never	sometimes	sometimes	never	never	usually	never	almost never/never	almost never/never	some of the time	almost never/never	almost always/always	almost always/always
362	other	63	male	university degree	yes	daily	0	always	rarely	always	occasionally	usually	always	never	usually	always	rarely	never	never	always	always	never	sometimes	rarely	always	always	always	never	always	usually	always	never	usually	usually	never	always	always	never	usually	usually	never	usually	rarely	almost never/never	some of the time	almost never/never	almost never/never	almost always/always	almost always/always
[truncated: 23 more columns]
